# Supplementary material
Source: HighWire-hosted journal article supplement (https://www.annals.org/content/suppl/2008/01/09/148.2.147)
Supplement: Lorenz_AT2_148-2-147-DC1-2.pdf [file Lorenz_AT2_148-2-147-DC1-2.pdf]

**Appendix Table 2. Interventions**

| Author, Year (Reference); Country | Funding Source | Study Design and Quality                                     | Population                                                                                                                                                                                                                | Sampling Approach and setting                                                                                                           | Intervention Description                                                                                                                              | Control Description | Time Point for Outcome Analysis                                                                                       | Outcomes                                                                                                                                                                                           | Description of Results                                                                                                                                                                                                                                                                                                                                                                                                                                                                                                                                                                                                                            |
|-----------------------------------|----------------|--------------------------------------------------------------|---------------------------------------------------------------------------------------------------------------------------------------------------------------------------------------------------------------------------|-----------------------------------------------------------------------------------------------------------------------------------------|-------------------------------------------------------------------------------------------------------------------------------------------------------|---------------------|-----------------------------------------------------------------------------------------------------------------------|----------------------------------------------------------------------------------------------------------------------------------------------------------------------------------------------------|---------------------------------------------------------------------------------------------------------------------------------------------------------------------------------------------------------------------------------------------------------------------------------------------------------------------------------------------------------------------------------------------------------------------------------------------------------------------------------------------------------------------------------------------------------------------------------------------------------------------------------------------------|
| Anderson et al., 1994 (82); USA   | Not reported   | RCT<br><br>Jadad: 2                                          | Number approached: Not reported<br><br>Number enrolled: 204<br>Number included in analysis of results: 117<br>Age(Mean age): Not reported<br>Gender: Not reported<br>Race/ethnicity: Not reported<br>Severity: All stages | Patients with >50% chance of dying within 5 yrs and hospitalized for symptom control.                                                   | Offered the opportunity to execute an Advance Directive (Let Me Decide AD forms) regarding the level of care they wanted to receive if incapacitated. | Usual care          | Baseline interview, re-interviewed at 3 months, 6 months, 1 year and 2 years, and every 6 months after for 3.5 years. | The Quality of Well-being Scale, a measure of health status and the General Well-being Index, a measure of psychological well-being for asymptomatic functioning (0 to 1 on 23 symptoms/problems). | 82 (67%) intervention patients completed an AD when offered but 13 refused to participate. No negative affect on physical or psychological well-being after 3.5 years. Offering an AD form to VA patients improves completion rates and does not affect physical or psychological well-being.                                                                                                                                                                                                                                                                                                                                                     |
| Bailey et al., 2005 (110); USA    | Not reported   | Pre-post of patients at single institution<br><br>Jadad: N/A | Number approached: Not reported<br><br>Number enrolled: 95 received care after                                                                                                                                            | Inpatient Veterans who died during a 6 month interval, identified by RN screening for patients at the end of life using simple criteria | The Inpatient Comfort Care Program: staff education, case identification, and implementation of a Comfort Care Order Set.                             | Usual care          | From initiation of order set to death                                                                                 | Processes of care at EOL                                                                                                                                                                           | There was a significant increase in the mean number of symptoms documented (1.7 [2.1 SD] to 4.4 [2.7 SD]) ( $P < .001$ ) and number of care plans increased (0.4 [0.9 SD] to 2.7 [2.3 SD]) ( $P < .001$ ). Opioid medication availability increased from 57.1% to 83.3% ( $P < .001$ ) and DNR reported orders increased from 61.9% to 85.1% ( $P < .001$ ). There were non-significant changes in the proportion of death that occurred in ICUs ( $P = .17$ ); use of G tubes ( $P = .40$ ); and increase in the use of restraints ( $P < .001$ ). Results indicate that EOL care improved with the introduction of the palliative care program. |

implementation  
 Number  
 included in  
 analysis of  
 results: 203 (108  
 pre and 95 post)  
 Mean Age:  
 Mean years (pre-  
 group) 69  
 Gender: male  
 98%  
 Race: white 57%  
 Disease: Mixed  
 Severity:  
 Advanced

|                                    |                                                   |                                            |                                                                                                                                                                                                              |                                                                                     |                                                                                                                                                                                                   |                                                                                                                     |                                      |                                                                                                                                                                                |                                                                                                                                                                                                                                                                                                                                                                                                                                                                                                                                                                                                                                                    |
|------------------------------------|---------------------------------------------------|--------------------------------------------|--------------------------------------------------------------------------------------------------------------------------------------------------------------------------------------------------------------|-------------------------------------------------------------------------------------|---------------------------------------------------------------------------------------------------------------------------------------------------------------------------------------------------|---------------------------------------------------------------------------------------------------------------------|--------------------------------------|--------------------------------------------------------------------------------------------------------------------------------------------------------------------------------|----------------------------------------------------------------------------------------------------------------------------------------------------------------------------------------------------------------------------------------------------------------------------------------------------------------------------------------------------------------------------------------------------------------------------------------------------------------------------------------------------------------------------------------------------------------------------------------------------------------------------------------------------|
| Bookbinder et al., 2005 (109); USA | New York State Department of Health Quality Grant | Pre-post of patients at single institution | Number approached: Not reported                                                                                                                                                                              | Inpatients who were expected to die within days or weeks on one of 5 hospital wards | The Palliative Care for Advanced Disease pathway implemented on 3 hospital units (Oncology, Geriatrics, and in inpatient palliative care/hospice unit as part of a quality improvement initiative | Usual care pre-intervention (on 3 intervention wards) and in 2 general medical units not receiving the intervention | From institution of pathway to death | Goals of care indicated by four indices evaluated change over time: the mean number of symptoms assessed, problematic symptoms, processes of care, and consultations requested | 9 of 27 patients (33%) on the oncology/geriatrics units were more likely to have DNR orders than the comparison units whereas the comparison units were more likely to use "morphine infusions" and CPR than Intervention units. The mean number of symptoms assessed increased in all units ( $P < 0.001$ ) for all comparisons; number of problem symptoms identified ( $P = 0.014$ ) and the number of interventions consistent with the pathway increased only on the palliative care/hospice unit ( $P = 0.021$ ); medical consultations declined on all units and reached significance on the geriatrics and oncology units ( $P = 0.037$ ). |
|                                    |                                                   | Jadad: N/A                                 | Number enrolled: 156 received care after implementation<br>Number included in analysis of results: 257<br>Age: mean years 69-74<br>Gender: Not reported<br>Race: White 49-75% among groups<br>Disease: Mixed |                                                                                     |                                                                                                                                                                                                   |                                                                                                                     |                                      |                                                                                                                                                                                |                                                                                                                                                                                                                                                                                                                                                                                                                                                                                                                                                                                                                                                    |

|                                     |                        |                                              | Severity:<br>Advanced                                                                                                                                                                                                                          |                                                                                                                  |                                                                                                                                                                                                                                                                              |                                               |                                       |                                                                                                                                                         |                                                                                                                                                                                                                                                                                                                                                                                                                                                             |  |
|-------------------------------------|------------------------|----------------------------------------------|------------------------------------------------------------------------------------------------------------------------------------------------------------------------------------------------------------------------------------------------|------------------------------------------------------------------------------------------------------------------|------------------------------------------------------------------------------------------------------------------------------------------------------------------------------------------------------------------------------------------------------------------------------|-----------------------------------------------|---------------------------------------|---------------------------------------------------------------------------------------------------------------------------------------------------------|-------------------------------------------------------------------------------------------------------------------------------------------------------------------------------------------------------------------------------------------------------------------------------------------------------------------------------------------------------------------------------------------------------------------------------------------------------------|--|
| Brumley et al., 2003 (83); USA      | Garfield Memorial Fund | Pre-post of patients at a single institution | Number approached: Not reported                                                                                                                                                                                                                | Patients who died with a life expectancy of 1 year or with life expectancy of <2 yrs receiving home health care. | Multidisciplinary home-based palliative care program designed to facilitate the transition from acute to palliative care during the last 12 months of life, with physician, RN, SW team, focusing on symptom relief, emotional and spiritual support, and patient education. | Control patients received home-based services | Pre/Post with follow-up over 2 years. | Pt/Surrogate satisfaction, hospital days, Emergency department visits, skilled nursing facility days, physician office visits, home visits              | Intervention patients were older, sicker, less likely to have CHF, more likely to have cancer. Controlling for differences, intervention patients had increased satisfaction with services at least 60 days after enrollment, significantly fewer hospital visits (mean 2.4 vs. 9.3 $P < 0.001$ ) and ED visits (0.9 vs. 2.3, $P < 0.001$ ), and 45% lower costs. Palliative care program can reduce use of acute care services among seriously ill adults. |  |
|                                     |                        | Jadad: N/A                                   | Number enrolled: 558<br>Number included in analysis of results: 300 (including 169 control patients)<br>Age: Mean age: Not reported<br>Gender: Not reported<br>Race/ethnicity: Not reported<br>Disease: Not reported<br>Severity: Not reported |                                                                                                                  |                                                                                                                                                                                                                                                                              |                                               |                                       |                                                                                                                                                         |                                                                                                                                                                                                                                                                                                                                                                                                                                                             |  |
| Campbell and Guzman, 2003 (84); USA | Not Reported           | Intervention with historical control group   | Number approached: Not reported                                                                                                                                                                                                                | Consecutive patients in a medical ICU of a university hospital.                                                  | Daily family consultations addressing patients' prognosis and treatment goals, implementing DNR orders, and                                                                                                                                                                  | Usual care                                    | Baseline and throughout ICU stay      | ICU length of stay, mortality, hospital days, DNR decisions, LOS between identification of the poor prognosis and establishment of EOL treatment goals. | Patients and families had fewer hospital days 20.6 vs. 15.1 ( $P = 0.06$ ) for multisystem organ failure patients and 8.6 vs. 4.7 ( $P < 0.001$ ) for GCI patients. Dying patients spent less time in the ICU. Palliative care intervention decreased the time between poor prognosis and EOL goals ( $4.7 \pm 2.4$ days MOSF, $3.5 \pm 0.5$ CGI).                                                                                                          |  |

|                                     |              |                                                          | comfort measures                                                                                                                                                                                                                                                                                                        |                                         |                                                                                       |            |                                         |                                                           |                                                                                                                                                                                                |  |
|-------------------------------------|--------------|----------------------------------------------------------|-------------------------------------------------------------------------------------------------------------------------------------------------------------------------------------------------------------------------------------------------------------------------------------------------------------------------|-----------------------------------------|---------------------------------------------------------------------------------------|------------|-----------------------------------------|-----------------------------------------------------------|------------------------------------------------------------------------------------------------------------------------------------------------------------------------------------------------|--|
|                                     |              | Jadad: N/A                                               | Number enrolled: 81, 41 prospective cohort, 40 historical control<br>Number included in analysis of results: 81<br>Age: mean years 53 intervention vs. 58 control<br>Gender: Not reported<br>Race/ethnicity: Not reported<br>Disease: Multisystem organ failure with global cerebral ischemia<br>Severity: Not reported |                                         |                                                                                       |            |                                         |                                                           |                                                                                                                                                                                                |  |
| Campbell and Guzman, 2004 (85); USA | Not reported | Intervention with historical control group<br>Jadad: N/A | Number approached: 1,972 ICU admissions<br>Number enrolled: 52, 26 prospective cohort, 26 historical controls<br>Number included in analysis of results: 52<br>Age: mean years 81 intervention vs. 81 control<br>Gender: Not reported                                                                                   | Consecutive admissions to a medical ICU | Palliative care team consultation, family meeting, and discussion of withdrawing care | Usual care | Baseline to death or discharge from ICU | ICU length of stay, mortality, hospital days, DNR orders. | ICU length of stay was lower (intervention 3.5 days vs. 6.8 days control $P = 0.004$ ) and hospital days were lower (intervention 7.4 vs. 12.1 control $P = 0.007$ ). Mortality was unchanged. |  |

|                                 |                                                 |          |                                                                                |                                                                                                                     |                                                                                                                                                                       |                      |                     |                                                                                                                         |                                                                                                                                                                                                                                                                                                                                                                                                                                                                                                                                                           |
|---------------------------------|-------------------------------------------------|----------|--------------------------------------------------------------------------------|---------------------------------------------------------------------------------------------------------------------|-----------------------------------------------------------------------------------------------------------------------------------------------------------------------|----------------------|---------------------|-------------------------------------------------------------------------------------------------------------------------|-----------------------------------------------------------------------------------------------------------------------------------------------------------------------------------------------------------------------------------------------------------------------------------------------------------------------------------------------------------------------------------------------------------------------------------------------------------------------------------------------------------------------------------------------------------|
|                                 |                                                 |          | Race/ethnicity:<br>Not reported                                                |                                                                                                                     |                                                                                                                                                                       |                      |                     |                                                                                                                         |                                                                                                                                                                                                                                                                                                                                                                                                                                                                                                                                                           |
|                                 |                                                 |          | Disease:<br>Dementia                                                           |                                                                                                                     |                                                                                                                                                                       |                      |                     |                                                                                                                         |                                                                                                                                                                                                                                                                                                                                                                                                                                                                                                                                                           |
|                                 |                                                 |          | Severity:<br>Advanced stage                                                    |                                                                                                                     |                                                                                                                                                                       |                      |                     |                                                                                                                         |                                                                                                                                                                                                                                                                                                                                                                                                                                                                                                                                                           |
| Casarett et al., 2005 (86); USA | Department of Veterans Affairs and Beeson Award | RCT      | Number approached: 400                                                         | Residents and surrogates from 3 nursing homes (1 urban, 1 suburban, and 1 VA NH with ethnically diverse residents). | Structured interview identified hospice-appropriate patients. Their physicians were notified and asked to authorize hospice informational visit, which was then done. | Usual care           | Baseline to 30 days | 30-day hospice enrollment, family satisfaction for patients who died within 6 months, cost and resource utilization     | Intervention patients were more likely to enroll in hospice within 30 days (20% vs. 1%, $P < .001$ ), and had fewer acute care admissions (mean: 0.28 vs. 0.49; $P = .04$ ). Families of intervention residents rated care more highly (mean on a scale of 1-5: 4.1 vs. 2.5; $P = .04$ ).                                                                                                                                                                                                                                                                 |
|                                 |                                                 | Jadad: 3 | Number enrolled: 205                                                           |                                                                                                                     |                                                                                                                                                                       |                      |                     |                                                                                                                         |                                                                                                                                                                                                                                                                                                                                                                                                                                                                                                                                                           |
|                                 |                                                 |          | Number included in analysis of results: 107 intervention; 98 control           |                                                                                                                     |                                                                                                                                                                       |                      |                     |                                                                                                                         |                                                                                                                                                                                                                                                                                                                                                                                                                                                                                                                                                           |
|                                 |                                                 |          | Age: mean years 84                                                             |                                                                                                                     |                                                                                                                                                                       |                      |                     |                                                                                                                         |                                                                                                                                                                                                                                                                                                                                                                                                                                                                                                                                                           |
|                                 |                                                 |          | Gender: Male 25%                                                               |                                                                                                                     |                                                                                                                                                                       |                      |                     |                                                                                                                         |                                                                                                                                                                                                                                                                                                                                                                                                                                                                                                                                                           |
|                                 |                                                 |          | Race/ethnicity: White 74%                                                      |                                                                                                                     |                                                                                                                                                                       |                      |                     |                                                                                                                         |                                                                                                                                                                                                                                                                                                                                                                                                                                                                                                                                                           |
|                                 |                                                 |          | Disease: Cancer, dementia, CHF, COPD                                           |                                                                                                                     |                                                                                                                                                                       |                      |                     |                                                                                                                         |                                                                                                                                                                                                                                                                                                                                                                                                                                                                                                                                                           |
|                                 |                                                 |          | Severity: Charlson score, mean: 2.6 (0-7)                                      |                                                                                                                     |                                                                                                                                                                       |                      |                     |                                                                                                                         |                                                                                                                                                                                                                                                                                                                                                                                                                                                                                                                                                           |
| Coppola et al., 2001 (87); USA  | AHRQ                                            | CCT      | Number approached: 24 primary care and 17 hospital based physicians, 82 family | Physicians recruited from a network of 6 group primary care practices including 24 primary care                     | ADVANCE Project: Advance Directives Values Assessment and Communication Enhancement Project. Patients                                                                 | No advance directive | Pre/Post            | Accuracy of physicians' predictions of patients' preferences for 4 life-sustaining treatments in 9 hypothetical illness | Family surrogates' judgments were more accurate than physicians'. Hospital-based physicians making predictions without ADs had the lowest accuracy and Primary care physicians' accuracy was not improved by either type of AD. Accuracy and confidence in predictions of hospital-based physicians was significantly improved for some scenarios using a scenario-based AD. Although ADs do not improve the accuracy of substituted judgments for primary care physicians or family surrogates, they increase the accuracy of hospital-based physicians. |

surrogates of 82 patients

physicians of 82 elderly outpatients, 17 ER and critical care physicians who had no prior experience with the patients.

had been randomized to completing one type of directive. Physicians made substituted judgments after being provided with no patient AD, patient's value-based AD, or patient's scenario-based AD.

scenarios and whether ADs can improve the accuracy of substituted judgments made by primary care physicians and hospital-based physicians.

Jadad: N/A

Number enrolled: 24 primary care and 17 hospital based physicians, 82 family surrogates of 82 patients

Number included in analysis of results: 24 primary care and 17 hospital based physicians, 82 family surrogates of 82 patients

Age: mean years (physicians) 39 years

Gender: male 14/24 primary care and 15/17 inpatient physicians

Race/ ethnicity: white 21 / 24 primary care and 17/17 inpatient physicians

|                                    |                                                                                   |                              |                                                                                                                                                                                                                                                                                                                                                 |                                                                                                      |                                                                                                                  |                  |                                                      |                                                                                                                                                    |                                                                                                                                                                                                                                                                                                                                                                                       |
|------------------------------------|-----------------------------------------------------------------------------------|------------------------------|-------------------------------------------------------------------------------------------------------------------------------------------------------------------------------------------------------------------------------------------------------------------------------------------------------------------------------------------------|------------------------------------------------------------------------------------------------------|------------------------------------------------------------------------------------------------------------------|------------------|------------------------------------------------------|----------------------------------------------------------------------------------------------------------------------------------------------------|---------------------------------------------------------------------------------------------------------------------------------------------------------------------------------------------------------------------------------------------------------------------------------------------------------------------------------------------------------------------------------------|
|                                    |                                                                                   |                              | Disease: Diverse<br>Severity:<br>Healthy elderly                                                                                                                                                                                                                                                                                                |                                                                                                      |                                                                                                                  |                  |                                                      |                                                                                                                                                    |                                                                                                                                                                                                                                                                                                                                                                                       |
| Englehardt et al., 2006 (112); USA | Robert Wood Johnson, Fan Fox / Leslie R. Samuels, and Nathan Cummings Foundations | Randomized, controlled trial | Number approached: Not reported                                                                                                                                                                                                                                                                                                                 | Patient recruited from within 3 VVA medical centers, one home care, and 2 managed care organizations | Palliative care oriented care coordination delivered by nurses, social workers                                   | Usual care       | 3 and 6 month patient and 3 month surrogate outcomes | Effectiveness of communication with providers, satisfaction, willingness to participate in treatment planning, advance directive completion, costs | The intervention was associated with increased patient satisfaction with care and communication, and surrogates reported fewer problems with provider support. More intervention patients completed advance directives (69 vs. 48%, $P=0.006$ ). Median time to AD completion was 46 vs. 238 days ( $P=0.02$ ). There were no differences in survival and a trend toward lower costs. |
|                                    |                                                                                   | Jadad: 3                     | Number enrolled: 275 randomized<br>Number in analysis of results: 275<br>Age: mean intervention 71 years<br>Gender: 81% male<br>Race/ethnicity: 88% white, 11% black, and 1% other<br>Disease: 63% cancer, 20% COPD, and 17% CHF<br>Severity: Other than cancer, patients all met criteria of 1 ICU or 2 hospitalizations in the prior 6 months |                                                                                                      |                                                                                                                  |                  |                                                      |                                                                                                                                                    |                                                                                                                                                                                                                                                                                                                                                                                       |
| Gillick et al., 1999 (88); USA     | Not Reported                                                                      | Pre-post uncontrolled        | Number approached: 40                                                                                                                                                                                                                                                                                                                           | 38 NH residents without serious cognitive impairment and their                                       | Patients and surrogates given prioritization of three goals and asked to rank: life prolongation, maintenance of | No control group | Immediately post prioritization                      | Participation rates in goal setting, choices of goals by patients/surrogates, patient/surrogate agreement.                                         | 78% of residents or caregivers were willing to prioritize their goals and were more likely to opt for life prolongation (7) vs. surrogates (1) ( $P<0.001$ ). 6 residents chose not to make prioritizations vs. 2 surrogates.                                                                                                                                                         |

|                                    |                                            |            |                                                                                                                                                                                              |                                                                                  |                                                                                                                                                                                                        |            |                   |                                                                     |                                                                                                                                    |  |
|------------------------------------|--------------------------------------------|------------|----------------------------------------------------------------------------------------------------------------------------------------------------------------------------------------------|----------------------------------------------------------------------------------|--------------------------------------------------------------------------------------------------------------------------------------------------------------------------------------------------------|------------|-------------------|---------------------------------------------------------------------|------------------------------------------------------------------------------------------------------------------------------------|--|
|                                    |                                            |            |                                                                                                                                                                                              | surrogates in a 40 bed nursing unit within a 725 bed teaching nursing home.      | function, or comfort. Rankings were translated into care by NH                                                                                                                                         |            |                   |                                                                     |                                                                                                                                    |  |
|                                    |                                            | Jadad: N/A | Number enrolled: 40<br>Number included in analysis of results: 38<br>Age: mean years 88<br>Gender: 30 Females<br>Race/ethnicity: Not reported<br>Disease: Dementia<br>Severity: Not reported |                                                                                  |                                                                                                                                                                                                        |            |                   |                                                                     |                                                                                                                                    |  |
| Gutheil and Heyman 2005 (107); USA | Partnership for Caring, Samuels Foundation | RCT        | Number approached: Not reported                                                                                                                                                              | Elders randomly selected from membership lists of 3 senior centers in the Bronx. | Three multidisciplinary sessions including social workers, physicians, attorneys and the patient and their surrogate targeted at assisting higher functioning elders to complete advance care planning | Usual care | Post intervention | Agreement on scenarios, attitudes and knowledge about care planning | Following the intervention, intervention dyads scored higher on agreement, as well as attitudes and knowledge about care planning. |  |
|                                    |                                            | Jadad: 1   | Number enrolled: 49 elderly-surrogate dyads<br>Number included in analysis of results: 49 dyads<br>Age: mean years elderly persons 72 intervention vs. 74 control                            |                                                                                  |                                                                                                                                                                                                        |            |                   |                                                                     |                                                                                                                                    |  |

|                                |                                        |                     |                                                                                                                                                                                                                                                                                                                                                                                      |                                       |                                                                                                                                                                                                 |            |                                   |                   |                                                                                                                                                                                                                                                                                                                                                                                              |
|--------------------------------|----------------------------------------|---------------------|--------------------------------------------------------------------------------------------------------------------------------------------------------------------------------------------------------------------------------------------------------------------------------------------------------------------------------------------------------------------------------------|---------------------------------------|-------------------------------------------------------------------------------------------------------------------------------------------------------------------------------------------------|------------|-----------------------------------|-------------------|----------------------------------------------------------------------------------------------------------------------------------------------------------------------------------------------------------------------------------------------------------------------------------------------------------------------------------------------------------------------------------------------|
|                                |                                        |                     | Gender: Not reported<br>Race/ethnicity: > 50% African-American<br>Disease: Not reported<br>Severity: Not reported                                                                                                                                                                                                                                                                    |                                       |                                                                                                                                                                                                 |            |                                   |                   |                                                                                                                                                                                                                                                                                                                                                                                              |
| Hanson et al., 2005 (105); USA | Duke Endowment, Open Society Institute | Pre-post controlled | Number approached: Disease: Mixed<br><br>Number enrolled: 9 NHs (7 intervention, 2 control)<br>Number included in analysis of results: 9 NHs, 345 patients<br>Age: mean years 82 intervention and 78 control<br>Gender: Male 19% intervention and 29% control<br>Race/ethnicity: White 74% intervention vs. 62% control<br>Not reported<br>Severity: Severe cognitive impairment 18% | All NHs had existing hospice contacts | Quality improvement intervention observing plan-do-study-act approach to improving palliative care including in services with structured curriculum, monthly strategy / organizational meetings | Usual care | Baseline, 3 and 6 month follow-up | Processes of care | Hospice enrollment increased from 4% of residents at baseline to 7% post-intervention ( $P = 0.01$ ) and pain assessments increased from 18% to 60% ( $P < 0.001$ ). Use of non-pharmacologic pain strategies increased, and documented in-depth discussions about end of life care increased from 4% to 17% of cases ( $P < 0.001$ ). No change in processes was observed at control sites. |

|                                       |                      |            |                                                                                                                                                                                                                                                             |                                                                                 |                                                                                                                                                                                                                                                             |            |                                                                    |                                                                                                                                                            |                                                                                                                                                                                                                                                                                                                                                                                                                                                                  |
|---------------------------------------|----------------------|------------|-------------------------------------------------------------------------------------------------------------------------------------------------------------------------------------------------------------------------------------------------------------|---------------------------------------------------------------------------------|-------------------------------------------------------------------------------------------------------------------------------------------------------------------------------------------------------------------------------------------------------------|------------|--------------------------------------------------------------------|------------------------------------------------------------------------------------------------------------------------------------------------------------|------------------------------------------------------------------------------------------------------------------------------------------------------------------------------------------------------------------------------------------------------------------------------------------------------------------------------------------------------------------------------------------------------------------------------------------------------------------|
|                                       |                      |            | intervention and<br>26% control                                                                                                                                                                                                                             |                                                                                 |                                                                                                                                                                                                                                                             |            |                                                                    |                                                                                                                                                            |                                                                                                                                                                                                                                                                                                                                                                                                                                                                  |
| Heffner and Barbieri, 2001 (111); USA | Not Reported         | CCT        | Number approached: 1013 rehabilitation programs                                                                                                                                                                                                             | 284 patients enrolled in 14 cardiovascular rehabilitation programs in 11 states | Pt participation in educational advance care planning programs with materials on importance of planning, discussed living wills and DPAHC documents, and defined the role of a surrogate, and encouraged patients to learn more about advance care planning | Usual care | Two questionnaires administered 6 months apart between (1996-1998) | Completion of living will, durable power of attorney for healthcare, and discussions with their physicians about advance directives and life support care. | Both the educational and control groups demonstrated a larger proportion of patients who had completed living wills, durable power of attorney for healthcare, and discussions with their physicians about advance directives and life support care vs. prior to the study. Neither groups gained confidence, however, that their physicians understood their end-of-life care wishes. Only 8.6% of patients had a negative response to the educational program. |
|                                       |                      | Jadad: N/A | Number enrolled:<br>Number included in analysis of results: 14 Programs (7 intervention, 7 control)<br>Age: Patients at intervention sites mean 66 years<br>Gender: Male%<br>intervention<br>Race: Not Reported<br>Disease: Mixed<br>Severity: Not Reported |                                                                                 |                                                                                                                                                                                                                                                             |            |                                                                    |                                                                                                                                                            |                                                                                                                                                                                                                                                                                                                                                                                                                                                                  |
| Heffner et al., 1997 (89); USA        | Greenwall Foundation | CCT        | Number approached: 105                                                                                                                                                                                                                                      | Pts in pulmonary rehab in two ambulatory/outpatient medical care setting.       | Educational workshop on advance directives and other end-of-life issues; Patients given pamphlets, printed living will, durable powers of                                                                                                                   | Usual care | Baseline and post-workshop                                         | Physician-patient agreement/ understanding on goals of care, including DNR, Patient report of living will and/or DPAHC in chart, Patient report of life-   | Intervention patients had an increase ( $P < 0.05$ ) had increase in all 5 outcomes while control patients had increases in 3 of 5 outcomes. Intervention patients more likely to complete living will, 72% to 52%, appoint DPAHC, 86% to 34%, and discuss life-support decisions with physician, 52% to 16%.                                                                                                                                                    |

attorney for health care; had patient-physician discussions about advance directives and life support, and were asked about impressions that their physicians understood their EOL preferences.

support and/or AD discussion with physician.

Jadad: N/A

Number included in analysis of results: 93  
 Age: mean years 70 ± 10.3 yrs  
 Gender: 28 Males, 22 Females (intervention)  
 Race/ethnicity: Not reported  
 Disease: Asthma, COPD, healed TB, post surgery, pulmonary fibrosis  
 Severity: Moderate

|                                 |              |                                        |                                 |                                        |                                                                                                                                              |                      |                      |                                                                                                                                                                                                                           |                                                                                                                                                                                               |
|---------------------------------|--------------|----------------------------------------|---------------------------------|----------------------------------------|----------------------------------------------------------------------------------------------------------------------------------------------|----------------------|----------------------|---------------------------------------------------------------------------------------------------------------------------------------------------------------------------------------------------------------------------|-----------------------------------------------------------------------------------------------------------------------------------------------------------------------------------------------|
| Holzpfel et al., 2002 (90); USA | Not Reported | Intervention, without comparison group | Number approached: Not reported | Convenience sample of patients in ICU. | 4-step protocol for decision making in end-of-life care (e.g., withdrawal of life support). Changes in treatment pattern required agreement. | No comparison group. | Prospective analysis | Simplified acute physiologic score, Use of mechanical ventilation, Use of mechanical ventilation > 48 hours, ICU - length of stay, Death/Mortality, Death after withholding, withdrawing life support (ventilatory/other) | Withdrawal of life support was performed in 17% of ICU patients. Mean ICU stay was 10 days. Formal ICU protocol to withhold and/or withdraw treatment had high degree of surrogate agreement. |
|                                 |              | Jadad: N/A                             | Number included in              |                                        |                                                                                                                                              |                      |                      |                                                                                                                                                                                                                           |                                                                                                                                                                                               |

|                                   |                          |              |                                                                                                                                                                                                         |                                                                                                                                              |                                                                                                                              |            |                              |                                                               |                                                                                                                                                                                                                                                                                                 |  |
|-----------------------------------|--------------------------|--------------|---------------------------------------------------------------------------------------------------------------------------------------------------------------------------------------------------------|----------------------------------------------------------------------------------------------------------------------------------------------|------------------------------------------------------------------------------------------------------------------------------|------------|------------------------------|---------------------------------------------------------------|-------------------------------------------------------------------------------------------------------------------------------------------------------------------------------------------------------------------------------------------------------------------------------------------------|--|
|                                   |                          |              | analysis of results: 475<br>Age: mean years 57<br>Gender: 296 Males, 179 Females<br>Race/ethnicity: Not reported<br>Disease: Mixed disease<br>Severity: Severe                                          |                                                                                                                                              |                                                                                                                              |            |                              |                                                               |                                                                                                                                                                                                                                                                                                 |  |
| Karel et al., 2004 (106); USA     | Not reported             | Uncontrolled | Number approached: not reported<br><br>Number enrolled: 10<br>Number included in analysis of results: 10<br>Age: 54-76 years<br>Gender: Not reported<br>Disease: Not reported<br>Severity: Not reported | Convenience sample of veterans                                                                                                               | A Values Discussion Guide which focused on health –related values and beliefs, decision makers, and quality of life concerns | N/A        | Immediately after completion | Structured interviews                                         | This small sample of veterans found the decision guide helpful and useful, especially prompts related to prior experiences with late life decisions.                                                                                                                                            |  |
| Latimer et al., 1998 (35); Canada | Hamilton Civic Hospitals | Design: RCT  | Number approached: 61                                                                                                                                                                                   | All patients under palliative care services in the hospital. Eligibility criteria: knowledge of diagnosis, goals of treatment and prognosis; | Introducing intervention patients to the Patient Care Traveling Record, a passport-like health care summary.                 | Usual care | 2 months                     | Pain, mood, health care utilization, and patient satisfaction | With the exception of patients over 65 years of age, patients using the Patient Care Traveling Record reported decreased levels of uncertainty on follow-up. There was no additional use of health care services, no differences in mood states, pain relief, or satisfaction with health care. |  |

|                              |                                      |                                    |                                                                                                                                                                                                                                                   |                                                                                                                                                                                                                           |                                                                                                                                                              |            |                                |                                                                                                                |                                                                                                                                                                                                         |  |
|------------------------------|--------------------------------------|------------------------------------|---------------------------------------------------------------------------------------------------------------------------------------------------------------------------------------------------------------------------------------------------|---------------------------------------------------------------------------------------------------------------------------------------------------------------------------------------------------------------------------|--------------------------------------------------------------------------------------------------------------------------------------------------------------|------------|--------------------------------|----------------------------------------------------------------------------------------------------------------|---------------------------------------------------------------------------------------------------------------------------------------------------------------------------------------------------------|--|
|                              |                                      | Jadad: 2                           | <p>Number enrolled: 46</p> <p>Number included in analysis of results: 26 baseline, 21 follow-up</p> <p>Age: 54.6 yrs</p> <p>Gender: 50% Male</p> <p>Race / ethnicity: Not reported</p> <p>Disease: Not reported</p> <p>Severity: Not Reported</p> | <p>prognosis estimated to be 2 months or more;</p> <p>physical and emotional status assessed as adequate to participate; 18 years and older; able to read and write English; able to consent to participate in study.</p> |                                                                                                                                                              |            |                                |                                                                                                                |                                                                                                                                                                                                         |  |
| Lilly et al., 2003 (91); USA | Brigham and Women's Hospital, Boston | Intervention with comparison group | <p>Number approached: 2,361 consecutively admitted ICU patients</p> <p>Jadad: N/A</p> <p>Number</p>                                                                                                                                               | Consecutive admissions to ICU                                                                                                                                                                                             | Initial and intensive communication sessions of info on clinical status and expected outcomes among providers, patients, families within 72 hrs of ICU admit | Usual care | Baseline with 4 year follow-up | ICU - length of stay, ICU mortality rate, consensus among providers over 4 yrs after intervention implemented. | Intervention decreased LOS in ICU 4 days to 3 days, decreased ICU mortality 31.3% to 18.0% ( $P < 0.001$ ); resulted in fewer therapeutic interventions; and lasted for 4 years following intervention. |  |

enrolled:  
 Number included in analysis of results  
 Age: mean years 57 intervention vs. 58 control  
 Gender: males 296 / 475 intervention vs. 191 / 396 control  
 Race/ethnicity: Not reported  
 Disease: Mixed disease  
 Severity: Severe

|                                     |                                                  |                                                |                                                                                                                                                                                 |                                                                                                                                                   |                                                                                                                                                                                                                               |            |                                                                      |                                                          |                                                                                                                                                                                                                                                                                                                                                                                                                                         |
|-------------------------------------|--------------------------------------------------|------------------------------------------------|---------------------------------------------------------------------------------------------------------------------------------------------------------------------------------|---------------------------------------------------------------------------------------------------------------------------------------------------|-------------------------------------------------------------------------------------------------------------------------------------------------------------------------------------------------------------------------------|------------|----------------------------------------------------------------------|----------------------------------------------------------|-----------------------------------------------------------------------------------------------------------------------------------------------------------------------------------------------------------------------------------------------------------------------------------------------------------------------------------------------------------------------------------------------------------------------------------------|
| Monteleoni and Clark 2004 (92); USA | Lenox Hill Hospital and the United Hospital Fund | Intervention with historical comparison group. | Number approached: Not reported                                                                                                                                                 | All eligible patients from March to September, 2002 and prospective sample of patients March to September, 2003 in a 652 bed acute care hospital. | Quality improvement intervention on utilization of feeding tubes for providers; grand rounds addressing issue of feeding tubes; training of medical residents in EOL (pain management); and one month on geriatrics rotation. | Usual care | One year intervention prior compared with 1 year of historical data. | Feeding tubes placed, particularly in demented patients. | Number of feeding tubes placed decreased by >50%, Number placed in demented patients fell from 40 to 8 after intervention, but number of feeding tubes placed in patients with AD refusing artificial feeding did not change (14-15% of tubes placed before/after intervention). Having an AD did not affect whether patients received feeding tubes even after palliative care intervention to decrease their use in demented patients |
|                                     |                                                  | Jadad: N/A                                     | Number included in analysis of results: 85<br>Mean age: Not Reported<br>Gender: Not Reported<br>Race/ethnicity: Not Reported<br>Disease: Not Reported<br>Severity: Not Reported |                                                                                                                                                   |                                                                                                                                                                                                                               |            |                                                                      |                                                          |                                                                                                                                                                                                                                                                                                                                                                                                                                         |

Morrison et Greenwall CCT Number NH social 2 social workers 2 of 4 social Baseline to 6 Patient Intervention social workers' patients more likely to have preferences documented for CPR

al., 2005 (93); Foundation.  
USA

approached: Not  
reported

workers  
educated in  
advanced care  
planning, had  
structured  
interviews  
with residents  
on admission,  
after clinical  
status change,  
and yearly.

in intervention  
received education  
in advance care  
planning using  
small-groups and  
role play;  
structured  
discussions with  
residents and  
proxies at  
admission, after  
any change in  
clinical status, and  
at yearly intervals;  
structured review  
of patients' care  
goals at team  
meetings;  
"flagging" of  
advance directives  
on NH charts; and  
feedback to  
providers on  
congruence of  
care provided and  
the preferences of  
patients.

workers in  
control  
received an  
educational  
training  
session on  
New York  
State law  
regarding  
advance  
directives.

months

documentation of  
preferences for CPR,  
preferences for  
artificial nutrition  
and hydration,  
intravenous  
antibiotics, and  
hospitalization; and  
concordance of  
treatments received  
with documented  
preferences were  
compared for  
residents assigned to  
intervention and  
control social  
workers.

(40% vs. 20%  $P=0.005$ ), tube feeding (49% vs. 16%  $P<0.001$ ) and other interventions. Intervention patients less likely to have treatments discordant with wishes (5% vs. 18%  $P=0.04$ ). NH based social worker intervention improved documentation of patient preferences for LST and increasing likelihood that patients received care concordant with their wishes

Jadad: N/A

Number  
enrolled: 4  
Social Workers  
and 139 NH  
residents from  
single NH.

Number  
included in  
analysis of  
results: 85

Age: Mean years  
87 intervention  
vs. 86 control

Gender: Male  
7/43 intervention  
vs. 10/96 control

Race/ethnicity:  
White 29/43  
intervention vs.  
74/96 control

Disease: Diverse  
 Severity:  
 Charlson 2.8  
 intervention vs.  
 4.1 control

|                                 |                                |          |                                                                          |                                                                                         |                                                                                                                                                              |                                        |                              |                                                                                                                                                                                                                                                                                                                                                                                                                                                   |                                                                                                                                                                                                                                                                                                                                                                                                                                                                                                                                                                                                                                                                                                                         |
|---------------------------------|--------------------------------|----------|--------------------------------------------------------------------------|-----------------------------------------------------------------------------------------|--------------------------------------------------------------------------------------------------------------------------------------------------------------|----------------------------------------|------------------------------|---------------------------------------------------------------------------------------------------------------------------------------------------------------------------------------------------------------------------------------------------------------------------------------------------------------------------------------------------------------------------------------------------------------------------------------------------|-------------------------------------------------------------------------------------------------------------------------------------------------------------------------------------------------------------------------------------------------------------------------------------------------------------------------------------------------------------------------------------------------------------------------------------------------------------------------------------------------------------------------------------------------------------------------------------------------------------------------------------------------------------------------------------------------------------------------|
| Pearlman et al., 2005 (94); USA | Department of Veterans Affairs | RCT      | Number approached: 34 providers, 848 patients of enrolled providers      | Outpatient veterans under care at the VA Puget Sound Health Care System, Seattle, Wash. | An advance care planning workbook (Your Life, Your Choices), motivational counseling by social workers, and cues to providers to discuss advance care plans. | Usual care and an advance care booklet | Baseline with 4 mo follow-up | Health status of patients; patients and proxies preferences for life-sustaining treatments in 5 health states, quality of life under 5 health conditions, preferences for withholding medical nutrition and fluids through tubes, controlling pain even if medication might hasten death, leeway in interpreting instructional directives, and having family members take their own interests into consideration when making surrogate decisions. | The intervention patients reported more advance care planning discussions with their providers (64% vs. 38%; $P < .001$ ). Living wills were filed in the medical record twice as often in the intervention group (48% vs. 23%; $P < .001$ ). Provider-patient dyads in the intervention group had higher agreement scores than the control group for treatment preferences, values, and personal beliefs (58% vs. 48%, 57% vs. 46%, and 61% vs. 47%, respectively; $P < .01$ for all comparisons). The agreement scores for the proxy-patient dyads did not differ between groups for treatment preferences and values, but were higher in the intervention than the control group for personal beliefs (67% vs. 56%). |
|                                 |                                | Jadad: 2 | Number enrolled: 24 (15 physicians, 9 nurse practitioners); 280 patients |                                                                                         |                                                                                                                                                              |                                        |                              |                                                                                                                                                                                                                                                                                                                                                                                                                                                   |                                                                                                                                                                                                                                                                                                                                                                                                                                                                                                                                                                                                                                                                                                                         |
|                                 |                                |          | Number included in analysis of results: 248 patients                     |                                                                                         |                                                                                                                                                              |                                        |                              |                                                                                                                                                                                                                                                                                                                                                                                                                                                   |                                                                                                                                                                                                                                                                                                                                                                                                                                                                                                                                                                                                                                                                                                                         |
|                                 |                                |          | Age: mean years 69 intervention vs. 70 controls                          |                                                                                         |                                                                                                                                                              |                                        |                              |                                                                                                                                                                                                                                                                                                                                                                                                                                                   |                                                                                                                                                                                                                                                                                                                                                                                                                                                                                                                                                                                                                                                                                                                         |
|                                 |                                |          | Gender: male 95% both groups                                             |                                                                                         |                                                                                                                                                              |                                        |                              |                                                                                                                                                                                                                                                                                                                                                                                                                                                   |                                                                                                                                                                                                                                                                                                                                                                                                                                                                                                                                                                                                                                                                                                                         |
|                                 |                                |          | Race / ethnicity:                                                        |                                                                                         |                                                                                                                                                              |                                        |                              |                                                                                                                                                                                                                                                                                                                                                                                                                                                   |                                                                                                                                                                                                                                                                                                                                                                                                                                                                                                                                                                                                                                                                                                                         |

|                                    |                                                                                          |                              |                                                                                                                                                                                                                                                                                                                                                                                                                                                                                    |                                                                                                                                   |                                                                                                                  |            |                                   |                                                                        |                                                                                                                                                                                                                                                                                                                                                                                                                                                                                                                                                                             |
|------------------------------------|------------------------------------------------------------------------------------------|------------------------------|------------------------------------------------------------------------------------------------------------------------------------------------------------------------------------------------------------------------------------------------------------------------------------------------------------------------------------------------------------------------------------------------------------------------------------------------------------------------------------|-----------------------------------------------------------------------------------------------------------------------------------|------------------------------------------------------------------------------------------------------------------|------------|-----------------------------------|------------------------------------------------------------------------|-----------------------------------------------------------------------------------------------------------------------------------------------------------------------------------------------------------------------------------------------------------------------------------------------------------------------------------------------------------------------------------------------------------------------------------------------------------------------------------------------------------------------------------------------------------------------------|
|                                    |                                                                                          |                              | white 89%<br>intervention vs.<br>88% control<br>Disease: Diverse<br>Severity: Almost<br>40% of both<br>groups rated<br>health fair or<br>poor                                                                                                                                                                                                                                                                                                                                      |                                                                                                                                   |                                                                                                                  |            |                                   |                                                                        |                                                                                                                                                                                                                                                                                                                                                                                                                                                                                                                                                                             |
| Perry et al.,<br>2005 (95);<br>USA | Robert Wood<br>Johnson<br>Foundation,<br>National<br>Kidney<br>Foundation<br>of Michigan | 3 arm RCT<br><br>Jadad: 2    | Number<br>approached: 280<br>patients from 21<br>dialysis centers<br><br>Number<br>enrolled: 203<br>patients from 21<br>dialysis centers<br><br>Number<br>included in<br>analysis of<br>results: 203<br>patients<br><br>Age: mean years<br>44-45 among<br>groups<br><br>Gender: male<br>54-46% among<br>groups<br><br>Race / ethnicity:<br>African-<br>American 37-<br>39% among<br>groups<br><br>Disease: End<br>stage renal<br>disease<br><br>Severity:<br>Dialysis<br>dependent | Patients<br>recruited from<br>community<br>dialysis<br>centers that<br>were selected<br>because of<br>social work<br>availability | Advance directive<br>peer mentoring vs.<br>printed materials<br>prepared by the<br>National Kidney<br>Foundation | Usual care | Baseline and 2-<br>4 months later | Well-being,<br>satisfaction, death<br>acceptance, and AD<br>completion | Significantly influenced the completion of ADs overall compared with distributing standard printed material or no specific designed intervention. However, the influence was most prominent among African Americans, not only increasing actual completion of ADs ( $P < 0.001$ ) and comfort discussing ADs ( $P < 0.01$ ), but also improving subjective well-being ( $P < 0.05$ ) and anxiety ( $P < 0.05$ ) during the study period. Results did not appear among white patients, although printed material on ADs decreased reported suicidal ideation ( $P < 0.05$ ). |
| Ratner et al.,<br>2001 (96);       | Allina<br>Foundation                                                                     | Uncontrolled<br>intervention | Number<br>approached: Not                                                                                                                                                                                                                                                                                                                                                                                                                                                          | Patients<br>identified by                                                                                                         | Formally<br>structured social                                                                                    | N/A        | Baseline and                      | Chart based                                                            | 83 patients (99%) were willing to complete an AD and of 54 patients expressing a clear                                                                                                                                                                                                                                                                                                                                                                                                                                                                                      |

|                                      |                                            |            |                                                                                                                                                                                                                                                                                                               |                                                                                                                            |                                                                                                                                                                                         |            |                                                      |                                                                                                                                           |                                                                                                                                                                                                                                            |
|--------------------------------------|--------------------------------------------|------------|---------------------------------------------------------------------------------------------------------------------------------------------------------------------------------------------------------------------------------------------------------------------------------------------------------------|----------------------------------------------------------------------------------------------------------------------------|-----------------------------------------------------------------------------------------------------------------------------------------------------------------------------------------|------------|------------------------------------------------------|-------------------------------------------------------------------------------------------------------------------------------------------|--------------------------------------------------------------------------------------------------------------------------------------------------------------------------------------------------------------------------------------------|
| USA                                  |                                            |            | reported                                                                                                                                                                                                                                                                                                      | home health agency as having life-limiting illness and referred for social worker assessment                               | worker visits for discussion of advance care planning with patients and their families during home visits, Documentation of health care directives using an advance care planning tool. |            | minimum 6 mo. follow-up (median follow-up: 191 days) | completion of advance directive, Consensus among providers, Time between documenting an advance care plan and death, Location of death.   | preference, 46 (82%) wanted to die at home and 43 (75%) did die at home. Discussions in patients home increase advance directive completion and patient desire for death at home.                                                          |
|                                      |                                            | Jadad: N/A | Number enrolled: 84<br>Number included in analysis of results: 84<br>Age: Mean years 75 (range: 37-94)<br>Gender: 51% Female.<br>Disease: Various<br>Severity: Life-limiting illness not on hospice<br>Disease: cancer (55%), cardiac, pulmonary, neurology, other<br>Severity: Unclear<br>Race: Not reported |                                                                                                                            |                                                                                                                                                                                         |            |                                                      |                                                                                                                                           |                                                                                                                                                                                                                                            |
| Schneiderman et al., (103) 2003; USA | Agency for Healthcare Research and Quality | RCT        | Number approached: 551                                                                                                                                                                                                                                                                                        | Consecutive ICU patients at 7 US hospitals referred by nurses who identified patients with potential value laden conflicts | Ethics consultations by individuals with advanced training or experience in bioethics                                                                                                   | Usual care | Following death or discharge (1-2 weeks)             | Hospital and ICU days, use of life sustaining treatments, perceptions of experiences with care and consultation from providers and family | No difference in mortality, but reduced hospital (-2.95 $P=0.01$ ) and ICU (-1.44, $P=0.03$ ) days and ventilatory support (-1.7 days, $P=0.03$ ) 87% of providers and surrogates agreed consultation was helpful in addressing conflicts. |
|                                      |                                            | Jadad: 3   | Number                                                                                                                                                                                                                                                                                                        |                                                                                                                            |                                                                                                                                                                                         |            |                                                      |                                                                                                                                           |                                                                                                                                                                                                                                            |

enrolled: 551  
 Number in analysis of results: 546  
 Age: mean years intervention 68 vs. control 68  
 Gender  
 Race/ethnicity: intervention white 63% vs. control 63%  
 Disease: Diverse  
 Severity: Advanced (63% of intervention and 58% of control patients died in hospital)

|                                      |                                           |         |                                                                                                                                                                                                     |                                                                                                                           |                                                                                       |            |                                          |                                                                                                                                           |                                                                                                                                                                     |
|--------------------------------------|-------------------------------------------|---------|-----------------------------------------------------------------------------------------------------------------------------------------------------------------------------------------------------|---------------------------------------------------------------------------------------------------------------------------|---------------------------------------------------------------------------------------|------------|------------------------------------------|-------------------------------------------------------------------------------------------------------------------------------------------|---------------------------------------------------------------------------------------------------------------------------------------------------------------------|
| Schneiderman et al., (104) 2000; USA | Agency for Healthcare Policy and Research | RCT     | Number approached: Not reported                                                                                                                                                                     | Consecutive ICU patients at 1 US hospital referred by nurses who identified patients with potential value laden conflicts | Ethics consultations by individuals with advanced training or experience in bioethics | Usual care | Following death or discharge (2-4 weeks) | Hospital and ICU days, use of life sustaining treatments, perceptions of experiences with care and consultation from providers and family | No difference in mortality, but reduced hospital and ICU days and lower use of life sustaining treatment. Most providers and patients found the experience helpful. |
|                                      |                                           | Jadad:2 | Number enrolled: 74<br>Number in analysis of results: 70<br>Age: Mean years, intervention 46 vs. control 52<br>Gender<br>Race/ethnicity: intervention white 40% vs. control 43%<br>Disease: Diverse |                                                                                                                           |                                                                                       |            |                                          |                                                                                                                                           |                                                                                                                                                                     |

|                                 |                                                                                  |          |                                                                                                                                                                                                                                                                                 |                                                                                                                                            |                                                                                                                                                                             |                                    |                                            |                                                                                                                                                    |                                                                                                                                                                                                                                                                                                               |
|---------------------------------|----------------------------------------------------------------------------------|----------|---------------------------------------------------------------------------------------------------------------------------------------------------------------------------------------------------------------------------------------------------------------------------------|--------------------------------------------------------------------------------------------------------------------------------------------|-----------------------------------------------------------------------------------------------------------------------------------------------------------------------------|------------------------------------|--------------------------------------------|----------------------------------------------------------------------------------------------------------------------------------------------------|---------------------------------------------------------------------------------------------------------------------------------------------------------------------------------------------------------------------------------------------------------------------------------------------------------------|
|                                 |                                                                                  |          | Severity:<br>Advanced<br>(60% of patients<br>in both groups<br>died in hospital)                                                                                                                                                                                                |                                                                                                                                            |                                                                                                                                                                             |                                    |                                            |                                                                                                                                                    |                                                                                                                                                                                                                                                                                                               |
| Schwartz et al., 2002 (97); USA | Fairlawn Foundation U Mass Memorial Foundation and the Stoddard Charitable Trust | RCT      | Number approached: 337                                                                                                                                                                                                                                                          | Ambulatory elderly patients in 2 geriatrician practices and an independent living facility                                                 | Facilitated "Respecting Choices" interview with informational pamphlet Patients/surrogates discussed advance care plans with trained nurse and given healthcare proxy form. | 30 Controls given only proxy form. | Baseline and 2 months follow-up            | Attitudes towards end of life decision making (questionnaire), Patient-surrogate concurrence in end-of-life care, Change in treatment preferences. | Intervention achieved higher congruence between agents and patients in their understanding of patients' end of life care preferences. Intervention patients became less willing to undergo life-sustaining treatments for a new serious medical problem and less willing to tolerate poor health states.      |
|                                 |                                                                                  | Jadad: 3 | Number enrolled: 66<br>Number in analysis of results: 61 (31 intervention)<br>Age: mean years 80 intervention vs. 81 control<br>Gender: male 3/31 intervention vs. 7/30 control<br>Race: white 97% intervention vs. 90% control<br><br>Disease: Mixed<br>Severity: Not Reported |                                                                                                                                            |                                                                                                                                                                             |                                    |                                            |                                                                                                                                                    |                                                                                                                                                                                                                                                                                                               |
| Song et al., 2005 (98); USA     | Sigma Theta Tau International                                                    | RTC      | Number approached: 80 patient-surrogate dyads                                                                                                                                                                                                                                   | Patients and their care-givers (as dyads) undergoing semi-elective cardiac surgery who were > 50 years of age, had an adult surrogate, and | Patient-centered advanced care planning intervention                                                                                                                        | Usual care                         | Baseline and immediately post intervention | Pt/surrogate agreement on goals of care, advance care planning knowledge, anxiety, patient decisional conflict                                     | Intervention improved patient/surrogate agreement (Delta [means what?]=1.27, P <0.01) reduced decisional conflict (Delta=-0.77, P <0.05). No difference in anxiety or advance care planning knowledge. Advance care planning intervention can improve patient/surrogate agreement without increasing anxiety. |

|                            |                     |                           |                                                                                                                                                                                                                                                                      |                                                        |                                                                                                                                                       |                       |                        |                                                            |                                                                                                                                                                                        |
|----------------------------|---------------------|---------------------------|----------------------------------------------------------------------------------------------------------------------------------------------------------------------------------------------------------------------------------------------------------------------|--------------------------------------------------------|-------------------------------------------------------------------------------------------------------------------------------------------------------|-----------------------|------------------------|------------------------------------------------------------|----------------------------------------------------------------------------------------------------------------------------------------------------------------------------------------|
|                            |                     | Jadad: N/A                | Number enrolled: 32 dyads<br>Number in analysis of results: 32 dyads<br>Age: mean years 70 intervention vs. 68 control<br>Gender: Male intervention 50% vs. 56% control<br>Race: Not Reported<br>Disease: Coronary artery or valve surgery<br>Severity: Not Reported | were capable of decision-making in acute care hospital |                                                                                                                                                       |                       |                        |                                                            |                                                                                                                                                                                        |
| Soskis 1997 (99); USA      | Not Reported        | Uncontrolled intervention | 30 elderly or AIDS patients with services from non-profit social service agency, receiving home health, case management, and meals.                                                                                                                                  | Convenience sample                                     | Pts given opportunity to complete advance directive in home with trained case managers and provided assistance in decision-making and form completion | N/A                   | Post only.             | Completion of advance directive and treatment preferences. | 23/31 patients completed advance directive, many felt that form did not fully capture treatment preferences. Advance directive forms do not always fully capture treatment preferences |
|                            |                     | Jadad: N/A                | Age: Not Reported<br>Gender: Not Reported<br>Race: Not Reported<br>Disease: Not Reported<br>Severity: Not Reported                                                                                                                                                   |                                                        |                                                                                                                                                       |                       |                        |                                                            |                                                                                                                                                                                        |
| Stuart et al., 2003 (100); | Robert Wood Johnson | Pre-post uncontrolled     | Number approached: 360                                                                                                                                                                                                                                               | Consecutive patient                                    | Implementing the "CHOICES"                                                                                                                            | No control/comparison | 42 month demonstration | Location of death, Use of hospice and                      | Preliminary evidence supports the program's feasibility and acceptability to patients, families, physicians, and agency partners.                                                      |

|                               |                                             |                           |                                                                                  |                                                                                                                                                                                        |                                                                                              |       |                                                                              |                                                                   |                                                                                                                                                                                                                                                                         |
|-------------------------------|---------------------------------------------|---------------------------|----------------------------------------------------------------------------------|----------------------------------------------------------------------------------------------------------------------------------------------------------------------------------------|----------------------------------------------------------------------------------------------|-------|------------------------------------------------------------------------------|-------------------------------------------------------------------|-------------------------------------------------------------------------------------------------------------------------------------------------------------------------------------------------------------------------------------------------------------------------|
| USA                           | Foundation                                  |                           | referred to intervention                                                         | referral, 51% referred by physician, 31% referred by Case Manager                                                                                                                      | home care management program.                                                                | group |                                                                              | palliative care.                                                  |                                                                                                                                                                                                                                                                         |
|                               |                                             | Jadad: N/A                | Number enrolled: 208<br>Number included in analysis of results: 208              |                                                                                                                                                                                        |                                                                                              |       |                                                                              |                                                                   |                                                                                                                                                                                                                                                                         |
|                               |                                             |                           | Age: Mean years 81<br>Race: 60% White, 32% Black, 5% Asian, 2% Latino            |                                                                                                                                                                                        |                                                                                              |       |                                                                              |                                                                   |                                                                                                                                                                                                                                                                         |
|                               |                                             |                           | Gender: 38% Male<br>Disease: Mixed disease- 80% non-cancer<br>Severity: Advanced |                                                                                                                                                                                        |                                                                                              |       |                                                                              |                                                                   |                                                                                                                                                                                                                                                                         |
| Tolle et al., 1998 (101); USA | Greenwall Foundation and Collins Foundation | Uncontrolled intervention | Number approached: Not reported                                                  | Convenience sample from 8 nursing homes in one state (3 urban, 1 suburban, 4 rural) with a total of 629 residents. Retrospective chart review to identify those wanting "comfort only" | POLST form - designed to convey treatment preferences on one page when patients transferred. | N/A   | Pts followed for one year re hospitalizations, health status changes, deaths | Location of death, use of life-sustaining treatments, extend life | While 38 patients died, none received CPR, ventilator support, or ICU. 2% hospitalized to extend life and 5% died in acute care hospital. 24 patients hospitalized, 85% for comfort, 15% to POLST was respected regarding CPR. Pts had low levels of hospital transfers |
|                               |                                             | Jadad: N/A                | Number enrolled: 108 residents of 8 NHs<br>Number                                |                                                                                                                                                                                        |                                                                                              |       |                                                                              |                                                                   |                                                                                                                                                                                                                                                                         |

included in analysis of results: 108 residents  
 Age: Mean years 83  
 Gender: Male 31%  
 Race: White 98%  
 Disease: Mixed  
 Severity: Not Reported

|                                |                                                                 |                                                                |                                                                                                                                                                                                                                                                                                                                  |                                                                                                                                              |                                                                                                                                          |     |                                          |                                                                                                                                      |                                                                                                                                                                                                                                                                                                                                                                                                                                                    |
|--------------------------------|-----------------------------------------------------------------|----------------------------------------------------------------|----------------------------------------------------------------------------------------------------------------------------------------------------------------------------------------------------------------------------------------------------------------------------------------------------------------------------------|----------------------------------------------------------------------------------------------------------------------------------------------|------------------------------------------------------------------------------------------------------------------------------------------|-----|------------------------------------------|--------------------------------------------------------------------------------------------------------------------------------------|----------------------------------------------------------------------------------------------------------------------------------------------------------------------------------------------------------------------------------------------------------------------------------------------------------------------------------------------------------------------------------------------------------------------------------------------------|
| Treece et al., 2004 (108); USA | Greenwall Foundation and National Institute of Nursing Research | Intervention trial with no comparison group.<br><br>Jadad: N/A | Number approached: Not reported<br><br>Number enrolled: 117 deaths (76 post-intervention and 41 control) and 134 clinicians<br>Number included in Analysis: 117 patients and 134 clinicians<br>Age: mean years 57 years intervention vs. 57 control<br>Gender: male intervention 57% vs. 61 % control<br>Race / ethnicity: White | Patients who died in a medical ICU at a county owned, university operated tertiary, level I trauma center with 353 beds, and their providers | The development and implementation of a standardized order form for the withdrawal of life support when the patient was expected to die. | N/A | Pre/Post survey and medical chart review | Physician and RN satisfaction with the form; RN perspective on deceased patients' "quality of dying and death; pre/post intervention | Among RNs reporting that the form was used (n = 73), most (84%) reported that the order form was helpful and they were satisfied with the form. Almost all physicians (95%) reported the form helpful and >70% found 3 of 4 sections helpful. Quality of dying scores on 41 patients' pre and 76 deaths post intervention did not significantly change. While the form was helpful, it did not improve RN assessment of patients dying experience. |
|--------------------------------|-----------------------------------------------------------------|----------------------------------------------------------------|----------------------------------------------------------------------------------------------------------------------------------------------------------------------------------------------------------------------------------------------------------------------------------------------------------------------------------|----------------------------------------------------------------------------------------------------------------------------------------------|------------------------------------------------------------------------------------------------------------------------------------------|-----|------------------------------------------|--------------------------------------------------------------------------------------------------------------------------------------|----------------------------------------------------------------------------------------------------------------------------------------------------------------------------------------------------------------------------------------------------------------------------------------------------------------------------------------------------------------------------------------------------------------------------------------------------|

|                                  |                                                                                                                                                                                                                                                                  |                                             |                                                                                                                                                                                                                                                                                                      |                                         |                                                                                                                                                                                      |     |                            |                                                                                                                                                                                            |                                                                                                                                                                                                                                                                                  |
|----------------------------------|------------------------------------------------------------------------------------------------------------------------------------------------------------------------------------------------------------------------------------------------------------------|---------------------------------------------|------------------------------------------------------------------------------------------------------------------------------------------------------------------------------------------------------------------------------------------------------------------------------------------------------|-----------------------------------------|--------------------------------------------------------------------------------------------------------------------------------------------------------------------------------------|-----|----------------------------|--------------------------------------------------------------------------------------------------------------------------------------------------------------------------------------------|----------------------------------------------------------------------------------------------------------------------------------------------------------------------------------------------------------------------------------------------------------------------------------|
|                                  |                                                                                                                                                                                                                                                                  |                                             | intervention 82% vs. 76% control<br>Disease: Mixed<br>Severity: Advanced                                                                                                                                                                                                                             |                                         |                                                                                                                                                                                      |     |                            |                                                                                                                                                                                            |                                                                                                                                                                                                                                                                                  |
| Weisbord et al., 2003 (102); USA | Project on Death in America Faculty Scholars program, Greenwall Foundation Ladies Hospital Aid Society of Western Pennsylvania, the International Against Cancer, Yamagiwa-Yoshida Memorial International Cancer Study Fellow-ship, and the LAS Trust Foundation | Uncontrolled intervention<br><br>Jadad: N/A | Convenience sample of dialysis patients in ambulatory/outpatient medical care setting.<br><br>Number approached: 39 patients<br>Number enrolled:<br>Number used in analysis of results:<br>Age: Mean years 67±9.6 (range: 46-80)<br>Gender: 12 Females/7 Males<br>Race: 10 White/9 other<br>Disease: | Convenience sample of dialysis patients | Palliative care physicians performed an initial evaluation during dialysis visit, Written recommendations developed at weekly team meeting given to patient and their nephrologists. | N/A | Baseline and 4 weeks later | Patient report of advance directives discussion with physician, Completion of advance directive or durable power of attorney and treatment preferences, Satisfaction with palliative care. | Advance care planning discussions between nephrologists and patients/surrogates increased, AD did not increase. No differences were observed in symptoms, Health-Related Quality of Life, or number of patients establishing advance directives as a result of the intervention. |

Diabetes  
Severity: Severe,  
6 patients (32%)  
died by end of  
study  
Disease: Kidney  
disease/ Renal  
Failure  
Severity:  
Modified  
Charlson all > 8

---

AD = Advance directive; CCT = Controlled Trial; CHF = congestive heart failure; COPD = Chronic obstructive pulmonary disease; DNR= Do Not Resuscitate; DPAHC = Durable Power of Attorney for Health Care; ED = emergency department; EOL = End of Life; ICU = Intensive Care Unit; LOS = Length of Stay; LST = Life-sustaining treatment; N/A = Not applicable; NH = Nursing Home; POLST = Physician Orders for Life Sustaining Treatment; RCT = Randomized Controlled Trial; SD = Standard Deviation; VA = Veterans Administration.
