# Supplementary material
Source: HighWire-hosted journal article supplement (https://www.annals.org/content/suppl/2008/01/09/148.2.147)
Supplement: Lorenz_AT3_148-2-147-DC1-3.pdf [file Lorenz_AT3_148-2-147-DC1-3.pdf]

**Appendix Table 3. Caregiving\***

| Author, Year (Reference); Country | Funding Source                         | Study Design and Quality      | Population†                                                                                                                                                                                                                                                                                                                                                                                  | Sampling Approach and Setting                                                                                                   | Intervention Description                                                                                                                                                                                                                                     | Control Description                                        | Time Point for Outcome Analysis         | Outcomes                                                                                                    | Description of Results                                                                                                                                                                                                                                                                           |
|-----------------------------------|----------------------------------------|-------------------------------|----------------------------------------------------------------------------------------------------------------------------------------------------------------------------------------------------------------------------------------------------------------------------------------------------------------------------------------------------------------------------------------------|---------------------------------------------------------------------------------------------------------------------------------|--------------------------------------------------------------------------------------------------------------------------------------------------------------------------------------------------------------------------------------------------------------|------------------------------------------------------------|-----------------------------------------|-------------------------------------------------------------------------------------------------------------|--------------------------------------------------------------------------------------------------------------------------------------------------------------------------------------------------------------------------------------------------------------------------------------------------|
| Baker et al, 2000 (136, 137); USA | Robert Wood Johnson Foundation         | CCT/Prospective cohort        | Number approached: Not reported                                                                                                                                                                                                                                                                                                                                                              | Patients at high risk of death hospitalized at five U.S. teaching hospitals, randomized within physician specialty status group | Delivery of prognostic estimates for survival, function, pain, and treatment preferences to attending physicians by nurses trained to facilitate communication among providers, patients, and family. Patient counseling on prognosis and treatment options. | Usual care                                                 | Baseline hospitalization to after death | 8 item caregiver satisfaction with end-of-life care scale including a comfort score and communication score | This study described caregiver outcomes for the cohort, although it also evaluated the intervention effect differences and found none overall. However, if the death occurred after discharge, satisfaction was greater among those assigned to the intervention (OR, 1.98 [95% CI, 1.21–3.24]). |
|                                   |                                        | Jadad: NA                     | Number enrolled: Not reported<br>Number included in analysis of results: 767/983 (those with after death interviews among all deaths)<br>Age: median years 65.5<br>Gender: male 57%<br>Race/ethnicity: white 57%<br>Disease: COPD, CHF, ESLD, coma, metastatic colorectal cancer, stage III or IV lung cancer, multiple system organ failure with cancer or sepsis<br>Severity: Hospitalized |                                                                                                                                 |                                                                                                                                                                                                                                                              |                                                            |                                         |                                                                                                             |                                                                                                                                                                                                                                                                                                  |
| Bucher et al., 2001 (144); USA    | Not reported                           | Design: Uncontrolled pre–post | Number approached: Not reported                                                                                                                                                                                                                                                                                                                                                              | Convenience sample of family caregivers of patients receiving care at an oncology center                                        | Single 90-minute problem solving–oriented instructional session using the <i>Home Care Guide for Cancer</i>                                                                                                                                                  | NA                                                         | Baseline and 2 months                   | (Pre–post) Community resource information and problem solving ability                                       | Participants reported being more informed about community resources and better problem solving ability two months after a single educational session.                                                                                                                                            |
|                                   |                                        | Jadad: NA                     | Number enrolled: 54 family caregivers of 49 patients<br>Number included in analysis of results: 17 family caregivers of 14 patients<br>Age: patients (51 years), caregivers (48 years)<br>Gender: patients 57% male, caregivers 26% male<br>Race/ethnicity: Not reported<br>Disease and stage of illness: Stage III or IV advanced cancer                                                    |                                                                                                                                 |                                                                                                                                                                                                                                                              |                                                            |                                         |                                                                                                             |                                                                                                                                                                                                                                                                                                  |
| Burgio et al., 2003 (145); USA    | National Institute of Nursing Research | Design: RCT                   | Number approached: 289 dyads                                                                                                                                                                                                                                                                                                                                                                 | AD, caregiver dyads recruited from various dementia home and specialty clinics in                                               | Training in caregiver skills including behavioral modification of the demented patient with intensive home based training                                                                                                                                    | Periodic brief telephone calls focused on active listening | Baseline and 6 months                   | Patient problem behaviors, caregiver social support and activity, wellbeing                                 | This REACH study found no differences in any outcome at 6 months.                                                                                                                                                                                                                                |

|                                    |                                                                     |                               |                                                                                                                                                                                                                                                                                                                                                              |                                                                                                        |                                                                                                             |                                                                                 |                       |                                                                                                                        |                                                                                                                                                                                                                         |
|------------------------------------|---------------------------------------------------------------------|-------------------------------|--------------------------------------------------------------------------------------------------------------------------------------------------------------------------------------------------------------------------------------------------------------------------------------------------------------------------------------------------------------|--------------------------------------------------------------------------------------------------------|-------------------------------------------------------------------------------------------------------------|---------------------------------------------------------------------------------|-----------------------|------------------------------------------------------------------------------------------------------------------------|-------------------------------------------------------------------------------------------------------------------------------------------------------------------------------------------------------------------------|
|                                    |                                                                     | Jadad: 2                      | Number enrolled: 140 dyads<br>Number included in analysis of results: 118 dyads<br>Age: intervention mean caregiver 62 years vs. 64 control<br>Gender: intervention 47/61 female vs. 45/57 control<br>Race/ethnicity: intervention African-American 25/61 vs. 23/57 control<br>Disease: AD<br>Severity: Participants had to have 1 ADL or 2 IADL limitations | Birmingham                                                                                             |                                                                                                             |                                                                                 |                       |                                                                                                                        |                                                                                                                                                                                                                         |
| Burns et al., 2003 (146; USA)      | National Institute on Aging, National Institute of Nursing Research | Design: RCT                   | Number approached: 433 caregivers                                                                                                                                                                                                                                                                                                                            | Caregivers in Memphis, Tennessee, recruited from 14 county-wide practice sites serving 19 physicians   | Enhanced care: focused on improving the caregiver's well-being in response to behavioral problems           | Behavior care: focused on improving caregiver management of behavioral problems | Baseline to 24 months | Depression, upset or burden associated with behavioral problems, satisfaction with social support, ADL/IADL impairment | This REACH study found a higher risk for burden among behavior, but not enhanced, care recipients. Depression was greater among behavior care recipients (at all times), and problem behaviors improved in both groups. |
|                                    |                                                                     | Jadad score: 3                | Number enrolled: 167 caregiver-patient dyads<br>Number included in analysis of results: 120<br>Age: mean years 81 control and 79 intervention<br>Gender: male 40% Behavior vs. 49% Enhanced<br>Race/ethnicity: African-American 38% Behavior and 46.2% Enhanced<br>Disease: AD<br>Severity: Participants had to have 1 ADL or 2 IADL limitations             |                                                                                                        |                                                                                                             |                                                                                 |                       |                                                                                                                        |                                                                                                                                                                                                                         |
| Cameron et al., 2004 (150); Canada | University Health Network Mental Health Research Program            | Design: Uncontrolled pre-post | Number approached: 112 patients, 105 of whom had family caregivers                                                                                                                                                                                                                                                                                           | Convenience sample of family caregivers of patients receiving care at a hospital-based oncology center | Single 60 minute problem solving-oriented instructional session using the <i>Home Care Guide for Cancer</i> | NA                                                                              | Baseline, 4 weeks     | Caregiver emotional wellbeing, problem solving capability                                                              | Improvements in emotional tension ( $P < 0.03$ ) and nonsignificant improvement in confidence and problem solving orientation were noted.                                                                               |
|                                    |                                                                     | Jadad score: NA               | Number enrolled: 58 caregivers<br>Number included in analysis of results: 47 caregivers<br>Age: mean, 64 years<br>Gender: 58% male                                                                                                                                                                                                                           |                                                                                                        |                                                                                                             |                                                                                 |                       |                                                                                                                        |                                                                                                                                                                                                                         |

|                                   |                                                                     |                                         |                                                                                                                                                                                                                                                                                                                                                                                                              |                                                                                                                                      |                                                                                                           |                                                            |                            |                                                                                                                        |                                                                                                                                                                                                                                       |
|-----------------------------------|---------------------------------------------------------------------|-----------------------------------------|--------------------------------------------------------------------------------------------------------------------------------------------------------------------------------------------------------------------------------------------------------------------------------------------------------------------------------------------------------------------------------------------------------------|--------------------------------------------------------------------------------------------------------------------------------------|-----------------------------------------------------------------------------------------------------------|------------------------------------------------------------|----------------------------|------------------------------------------------------------------------------------------------------------------------|---------------------------------------------------------------------------------------------------------------------------------------------------------------------------------------------------------------------------------------|
|                                   |                                                                     |                                         | Race/ethnicity: Not reported<br>Disease: Cancer<br>Severity: Advanced                                                                                                                                                                                                                                                                                                                                        |                                                                                                                                      |                                                                                                           |                                                            |                            |                                                                                                                        |                                                                                                                                                                                                                                       |
| Eisdorfer et al., 2003 (147); USA | National Institute on Aging, National Institute of Nursing Research | Design: 3 arm RCT<br><br>Jadad score: 2 | Number approached: Not reported<br><br>Number enrolled: 225 caregivers<br><br>Number included in analysis of results: 147 caregivers<br>Age: caregiver mean years 66–73 across all conditions<br>Gender: 42/147 caregivers were male<br>Race/ethnicity: 76/147 caregivers were Cuban Americans<br>Disease: AD<br>Severity: Participants had to have 1 ADL or 2 IADL limitations                              | Caregivers and patients recruited from memory disorder and primary care clinics, social service agencies through community outreach. | Structural ecosystems theory (SET)–based therapist sessions with family, SET + telephone/computer support | Periodic brief telephone calls focused on active listening | Baseline, 6, 12, 18 months | Depression, upset or burden associated with behavioral problems, satisfaction with social support, ADL/IADL impairment | This REACH study found that depressive symptoms were lower at 6 months in the combined family therapy, telephone/computer support intervention. At 18 months, improvement was sustained in Cuban-American, but not white, caregivers. |
| Gitlin et al., 2003 (142); USA    | National Institute on Aging, National Institute of Nursing Research | Design:<br><br>Jadad score: 2           | Number approached: 413 caregivers<br><br>Number enrolled: 255 caregivers<br><br>Number included in analysis of results: 188 caregivers<br>Age: mean caregiver 60 years intervention vs. 61 controls<br>Gender: 75% female intervention vs. 77% control<br>Race/ethnicity: 54% African-American intervention vs. 52% control<br>Disease: AD<br>Severity: Participants had to have 1 ADL or 2 IADL limitations | Caregivers recruited from the Philadelphia Corporation for Aging and media announcements                                             | Environmental skill building program using 6 in home occupational therapist visits                        | Usual care                                                 | Baseline, 6 months         | Depression, upset or burden associated with behavioral problems, satisfaction with social support, ADL/IADL impairment | In this REACH study, intervention caregivers reported less upset with memory-related behaviors, less need for assistance, and better affect.                                                                                          |
| Gitlin et al., 2003 (141); USA    | National Institute on Aging,                                        | Design: Pooled RCTs                     | Number approached: Not reported                                                                                                                                                                                                                                                                                                                                                                              | Caregivers of patients with dementia in                                                                                              | 9 active conditions tested at 6 sites (skills training, telephone-linked computer, environmental          | 6 control conditions used                                  | Baseline to 6 month        | Common measures used at all sites—depression, upset                                                                    | Pre-planned pooled analysis of REACH interventions at 6 months demonstrated that interventions (pooled) vs. controls benefited                                                                                                        |

|                                |                                        |                 |                                                                                                                                                                                                                                                              |                                                                                                                                                                                                          |                                                                                                                                                                                                                  |                                                         |                    |                                                                                                      |                                                                                                                                                                                                                                                                                                                |
|--------------------------------|----------------------------------------|-----------------|--------------------------------------------------------------------------------------------------------------------------------------------------------------------------------------------------------------------------------------------------------------|----------------------------------------------------------------------------------------------------------------------------------------------------------------------------------------------------------|------------------------------------------------------------------------------------------------------------------------------------------------------------------------------------------------------------------|---------------------------------------------------------|--------------------|------------------------------------------------------------------------------------------------------|----------------------------------------------------------------------------------------------------------------------------------------------------------------------------------------------------------------------------------------------------------------------------------------------------------------|
|                                | National Institute of Nursing Research |                 |                                                                                                                                                                                                                                                              | community sites including clinical, social services, and health agency settings                                                                                                                          | skills building, behavioral and enhanced care, family-based multisystem in-home intervention and combined with computer telephone integration, caregiver classes and enhanced support group                      | including limited versions of interventions, usual care |                    | or burden associated with behavioral problems, satisfaction with social support, ADL/IADL impairment | burden ( $P = 0.022$ ). For depressive symptoms, family therapy and a computer-technology intervention were beneficial ( $P = 0.034$ ). Multicomponent, tailored interventions tended to be more effective.                                                                                                    |
|                                |                                        | Jadad score: NA | Number enrolled: 1202 (780 intervention, 442 control)<br>Number included in analysis of results: 1202<br>Age:<br>Gender:<br>Race/ethnicity:<br>Disease: AD<br>Severity: 1 ADL or 2 IADL limitations                                                          |                                                                                                                                                                                                          |                                                                                                                                                                                                                  |                                                         |                    |                                                                                                      |                                                                                                                                                                                                                                                                                                                |
| Hanks et al., 2002 (135); UK   | NHS Cancer R&D Program                 | RCT             | Number approached: 684                                                                                                                                                                                                                                       | Inpatient palliative care referrals                                                                                                                                                                      | In person palliative care consultation                                                                                                                                                                           | Telephonic palliative care advice                       | 1 week             | Symptom control and HR-QOL, global satisfaction, utilization                                         | No differences noted                                                                                                                                                                                                                                                                                           |
|                                |                                        | Jadad: 3        | Number enrolled: 261<br>Number in analysis of results: 109–191<br>Age: mean years 68 both groups<br>Gender : male intervention 54% vs. 53% control<br>Race/ethnicity: Not reported<br>Disease: cancer 93% intervention vs. 88% control<br>Severity: advanced |                                                                                                                                                                                                          |                                                                                                                                                                                                                  |                                                         |                    |                                                                                                      |                                                                                                                                                                                                                                                                                                                |
| Hughes et al., 2000 (134); USA | Department of Veterans Affairs         | RCT             | Number approached: Not reported                                                                                                                                                                                                                              | Hospitalized veterans who were being discharged to a 35 mile catchment area served by a home based primary care team, with 2 or more ADL impairments, or terminal illness, or homebound with CHF or COPD | Team-managed, home-based primary care including screening and targeting high-risk patients, 24-hour contact, team manager, prior approval of scheduled hospitalization, and team inclusion in discharge planning | Usual care                                              | 1,6, and 12 months | Functional status, health-related quality of life (HR-QOL), satisfaction, and cost/utilization       | Function did not differ, but improvements in most patient and caregiver HR-QOL scales were observed. Caregivers reported reduced burden ( $P = 0.008$ ) Costs were higher in the intervention group (12.1% at 12 months, $P = 0.005$ ) and may reflect shift of inpatient to nursing home and home care costs. |
|                                |                                        | Jadad: 3        | Number enrolled: 1966 patients and 1883 caregivers randomized<br>Number in analysis of results: 667 completed trial (80% of dropouts due to death or loss of cognitive function)                                                                             |                                                                                                                                                                                                          |                                                                                                                                                                                                                  |                                                         |                    |                                                                                                      |                                                                                                                                                                                                                                                                                                                |

|                                   |                                                                     |                 |                                                                                                                                                                                                                                                                                                                                     |                                                                                                                                             |                                                                                                                                                                                   |            |                                |                                                                                                                        |                                                                                                                                                                                                                                                                                                               |
|-----------------------------------|---------------------------------------------------------------------|-----------------|-------------------------------------------------------------------------------------------------------------------------------------------------------------------------------------------------------------------------------------------------------------------------------------------------------------------------------------|---------------------------------------------------------------------------------------------------------------------------------------------|-----------------------------------------------------------------------------------------------------------------------------------------------------------------------------------|------------|--------------------------------|------------------------------------------------------------------------------------------------------------------------|---------------------------------------------------------------------------------------------------------------------------------------------------------------------------------------------------------------------------------------------------------------------------------------------------------------|
|                                   |                                                                     |                 | Age: 70 years patients, 62 years caregivers<br>Gender: 97% male patients, 17% male caregivers<br>Race/ethnicity: 63% white, 30% black, 8% other<br>Disease: 21% terminally ill, 55% with COPD or CHF<br>Severity: 75% severely disabled                                                                                             |                                                                                                                                             |                                                                                                                                                                                   |            |                                |                                                                                                                        |                                                                                                                                                                                                                                                                                                               |
| Mahoney et al., 2003 (148); USA   | National Institute on Aging, National Institute of Nursing Research | Design: RCT     | Number approached: 143 caregivers                                                                                                                                                                                                                                                                                                   | Southern New England community and clinical sites                                                                                           | Automated tele-care that allowed dial-in to mailbox, bulletin board, automated respite/distraction conversations, interactive voice-response caregiver conversation with coaching | Usual care | Baseline, 6, 12, and 18 months | Depression, upset or burden associated with behavioral problems, satisfaction with social support, ADL/IADL impairment | Although there was no overall effect, as hypothesized, intervention participants with baseline mid-low mastery improved on behavioral problem, depression, and anxiety.                                                                                                                                       |
|                                   |                                                                     | Jadad: 2 score: | Number enrolled: 100 caregivers<br>Number included in analysis of results: 82–45 (outcome dependent)<br>Age: mean years intervention 61 vs. 64 control<br>Gender: female 40/49 intervention vs. 38/51 control<br>Race/ethnicity: white 38/49 intervention vs. 41/51 control<br>Disease: AD<br>Severity: 1 ADL or 2 IADL limitations |                                                                                                                                             |                                                                                                                                                                                   |            |                                |                                                                                                                        |                                                                                                                                                                                                                                                                                                               |
| Molloy et al., 2000 (149); Canada | Agency for Healthcare Research and Quality                          | Design: CCT     | Number approached; 215 nursing homes surveyed; 1292 residents at 6 randomized nursing homes                                                                                                                                                                                                                                         | Nursing homes in Ontario with >100 residents, selected as pairs similar in regard to annual hospitalization, level of care, hospital deaths | Quality improvement using Let Me Decide advance directives; training nurses as health care facilitators for implementation, chart flagging                                        | Usual care | Baseline, 6, 12, and 18 months | Directive completion, satisfaction with care and involvement in decision making, utilization and costs                 | In intervention homes, 49% of competent and 78% of incompetent residents completed directives. Satisfaction and mortality were similar between intervention and control homes, although hospitalization per resident (0.27 vs. 0.48, $P = 0.001$ ) and costs (Can \$3490 vs. \$5239, $P = 0.01$ ) were lower. |
|                                   |                                                                     | Jadad score: NA | Number enrolled: 6 nursing homes; 1133 residents<br>Number included in analysis of results: 6 nursing homes; 818 residents<br>Age: mean years 79–85 among homes<br>Gender: mean female 63–82% among homes<br>Race/ethnicity: mean white 94–100% among homes                                                                         |                                                                                                                                             |                                                                                                                                                                                   |            |                                |                                                                                                                        |                                                                                                                                                                                                                                                                                                               |

|                                    |                                                                                                              |                                                  |                                                                                                                                                |                                                                                                                                                                                                |                                                                                                         |                       |                                                                                             |                                         |                                                                                                                                                                                                                                                |
|------------------------------------|--------------------------------------------------------------------------------------------------------------|--------------------------------------------------|------------------------------------------------------------------------------------------------------------------------------------------------|------------------------------------------------------------------------------------------------------------------------------------------------------------------------------------------------|---------------------------------------------------------------------------------------------------------|-----------------------|---------------------------------------------------------------------------------------------|-----------------------------------------|------------------------------------------------------------------------------------------------------------------------------------------------------------------------------------------------------------------------------------------------|
|                                    |                                                                                                              |                                                  | Disease: Diverse<br>Severity: unable to consent due to cognitive impairment 36–94% among homes                                                 |                                                                                                                                                                                                |                                                                                                         |                       |                                                                                             |                                         |                                                                                                                                                                                                                                                |
| Ringdal et al., 2002 (138); Norway | Norwegian Cancer Society; Swedish Cancer Society, Norwegian Medical Association Fund for Quality Improvement | Design: CCT                                      | Number approached: 426 family members of 434 patients                                                                                          | Community healthcare districts in the Trondheim, Norway University Hospital service area                                                                                                       | Coordination, education among hospital-based palliative care staff, community practitioners, and family | Usual care            | After death survey                                                                          | Family satisfaction with care (FAMCARE) | Intervention vs. control family members were more satisfied with care (+7.7, $P < 0.016$ ). Spouses were more satisfied (+12.5, $P < 0.015$ ) than children.                                                                                   |
|                                    |                                                                                                              | Jadad score: NA                                  | Number enrolled: 312                                                                                                                           |                                                                                                                                                                                                |                                                                                                         |                       |                                                                                             |                                         |                                                                                                                                                                                                                                                |
|                                    |                                                                                                              |                                                  | Number included in analysis of results: 183                                                                                                    |                                                                                                                                                                                                |                                                                                                         |                       |                                                                                             |                                         |                                                                                                                                                                                                                                                |
|                                    |                                                                                                              |                                                  | Age: mean years 58 intervention vs. 54 control                                                                                                 |                                                                                                                                                                                                |                                                                                                         |                       |                                                                                             |                                         |                                                                                                                                                                                                                                                |
|                                    |                                                                                                              |                                                  | Gender: intervention mean male 32% vs. 31% control                                                                                             |                                                                                                                                                                                                |                                                                                                         |                       |                                                                                             |                                         |                                                                                                                                                                                                                                                |
|                                    |                                                                                                              |                                                  | Race/ethnicity: Not reported                                                                                                                   |                                                                                                                                                                                                |                                                                                                         |                       |                                                                                             |                                         |                                                                                                                                                                                                                                                |
|                                    |                                                                                                              |                                                  | Disease: Cancer                                                                                                                                |                                                                                                                                                                                                |                                                                                                         |                       |                                                                                             |                                         |                                                                                                                                                                                                                                                |
|                                    |                                                                                                              |                                                  | Severity: Advanced                                                                                                                             |                                                                                                                                                                                                |                                                                                                         |                       |                                                                                             |                                         |                                                                                                                                                                                                                                                |
| Ringdal et al., 2004 (139); Norway | Norwegian Cancer Society, Swedish Cancer Society, Norwegian Fund for Quality Improvement                     | CCT (Norway)/nonrandomized, controlled (Swedish) | Number approached: Not reported; family members of 434 cancer patients                                                                         | Norway—patients in health districts served by the palliative care unit Trondheim; Sweden—patients living in Malme receiving hospital-based palliative services while residing in the community | Palliative care programs coordinated with the community                                                 | Usual home based care | Baseline and every other month while patient alive, then 1, 3, 6, and 13 months after death | HR-QOL                                  | This analysis pooled results from two studies conducted with different designs, but similar measures. Role limitation due to emotional problems and mental health worsened or stayed the same in control, but improved in intervention groups. |
|                                    |                                                                                                              |                                                  | Number enrolled: 314 family members of patients (Norway) 204 family members of patients (Sweden); 731 patients (354 intervention, 377 control) |                                                                                                                                                                                                |                                                                                                         |                       |                                                                                             |                                         |                                                                                                                                                                                                                                                |
|                                    |                                                                                                              |                                                  | Number included in analysis of results: 517 caregivers completed at least one questionnaire                                                    |                                                                                                                                                                                                |                                                                                                         |                       |                                                                                             |                                         |                                                                                                                                                                                                                                                |
|                                    |                                                                                                              |                                                  | Age: caregiver mean years 58–65 across groups/sites                                                                                            |                                                                                                                                                                                                |                                                                                                         |                       |                                                                                             |                                         |                                                                                                                                                                                                                                                |

|                                        |                                            |                             |                                                                                                                                                                                                                                                                                            |                                                                                                                              |                                                                                                            |            |                                                                         |                                                                                                                                           |                                                                                                                                                                                                                                                               |
|----------------------------------------|--------------------------------------------|-----------------------------|--------------------------------------------------------------------------------------------------------------------------------------------------------------------------------------------------------------------------------------------------------------------------------------------|------------------------------------------------------------------------------------------------------------------------------|------------------------------------------------------------------------------------------------------------|------------|-------------------------------------------------------------------------|-------------------------------------------------------------------------------------------------------------------------------------------|---------------------------------------------------------------------------------------------------------------------------------------------------------------------------------------------------------------------------------------------------------------|
|                                        |                                            |                             | Gender: caregiver mean male 29–42% across groups/sites<br>Race/ethnicity: Not reported<br>Disease: Cancer<br>Severity: Incurable with predicted survival of 2–9 months                                                                                                                     |                                                                                                                              |                                                                                                            |            |                                                                         |                                                                                                                                           |                                                                                                                                                                                                                                                               |
| Schneiderman et al., 2000 (104); USA   | Agency for Healthcare Policy and Research  | RCT                         | Number approached: Not reported                                                                                                                                                                                                                                                            | Consecutive ICU patients at 1 U.S. hospital referred by nurses who identified patients with potential value laden conflicts  | Ethics consultations by individuals with advanced training or experience in bioethics                      | Usual care | Following death or discharge (2–4 weeks)                                | Hospital and ICU days, use of life sustaining treatments, perceptions of experiences with care and consultation from providers and family | No difference in mortality, but reduced hospital and ICU days and lower use of life sustaining treatment. Most providers and patients found the experience helpful.                                                                                           |
|                                        |                                            | Jadad: 2                    | Number enrolled: 74<br>Number in analysis of results: 70<br>Age: Mean years, intervention 46 vs. control 52<br>Gender Race/ethnicity: intervention white 40% vs. control 43%<br>Disease: Diverse<br>Severity: Advanced (60% of patients in both groups died in hospital)                   |                                                                                                                              |                                                                                                            |            |                                                                         |                                                                                                                                           |                                                                                                                                                                                                                                                               |
| Schneiderman et al., 2003 (103); USA   | Agency for Healthcare Research and Quality | RCT                         | Number approached: 551                                                                                                                                                                                                                                                                     | Consecutive ICU patients at 7 U.S. hospitals referred by nurses who identified patients with potential value laden conflicts | Ethics consultations by individuals with advanced training or experience in bioethics                      | Usual care | Following death or discharge (1–2 weeks)                                | Hospital and ICU days, use of life sustaining treatments, perceptions of experiences with care and consultation from providers and family | No difference in mortality, but reduced hospital (–2.95, <i>P</i> = 0.01) and ICU (–1.44, <i>P</i> = 0.03) days and ventilatory support (–1.7 days, <i>P</i> = 0.03) 87% of providers and surrogates agreed consultation was helpful in addressing conflicts. |
|                                        |                                            | Jadad: 3                    | Number enrolled: 551<br>Number in analysis of results: 546<br>Age: mean years intervention 68 vs. control 68<br>Gender Race/ethnicity: intervention white 63% vs. control 63%<br>Disease: Diverse<br>Severity: Advanced (63% of intervention and 58% of control patients died in hospital) |                                                                                                                              |                                                                                                            |            |                                                                         |                                                                                                                                           |                                                                                                                                                                                                                                                               |
| Smeenk et al., 1998 (143); Netherlands | National Committee of Chronic Disease in   | Design: Controlled pre–post | Number approached: Not reported                                                                                                                                                                                                                                                            | Terminally ill cancer patients and their caregivers discharged from                                                          | Specialist nurse coordinator, 24 hour telephone link to home care, home care case file, and care protocols | Usual care | One week before patient discharge, 1 and 4 weeks after, and after death | Caregiver quality of life                                                                                                                 | Caregiver quality of life was higher in intervention than control at 1 week following discharge and 3 months after death.                                                                                                                                     |

|                                    |                                                    |                               |                 |                                                                                                                                                                                                                                                |                                                                                          |                                                                                                                                                                                    |    |                                    |                   |                                                                                                    |
|------------------------------------|----------------------------------------------------|-------------------------------|-----------------|------------------------------------------------------------------------------------------------------------------------------------------------------------------------------------------------------------------------------------------------|------------------------------------------------------------------------------------------|------------------------------------------------------------------------------------------------------------------------------------------------------------------------------------|----|------------------------------------|-------------------|----------------------------------------------------------------------------------------------------|
|                                    | the Netherlands                                    |                               | Jadad score:    | Number enrolled: 116<br>Number included in analysis of results: 45<br>Age: mean years 55 intervention vs. 61 control<br>Gender: male intervention 29% vs. 36% control<br>Race/ethnicity: Not reported<br>Disease: Cancer<br>Severity: Terminal | hospital in Eindhoven                                                                    |                                                                                                                                                                                    |    |                                    |                   |                                                                                                    |
| Walsh and Schmidt, 2003 (140); USA | University of Miami School of Nursing Dean's Award | Design: Uncontrolled pre-post | Jadad score: NA | Number approached: 14<br>Number enrolled: 6<br>Number included in analysis of results: 5<br>Age: mean years 66<br>Gender: 3 men, 3 women<br>Race/ethnicity: 5/6 white<br>Disease: Mixed<br>Severity: Hospice patients                          | Caregivers of hospice patients thought to live 6 weeks or more referred by hospice staff | One home visit followed by 4 weeks of tele-care counseling from nurse interventionist using materials structured to help caregivers address psychosocial, practical personal needs | NA | Burden, depression, social support | Baseline, 4 weeks | Lower depression, despair, and disorganization were reported over time, although burden increased. |

\* AD = Alzheimer disease; ADL = activity of daily living; CCT = clinical controlled trial; CHF = congestive heart failure; COPD = chronic obstructive pulmonary disease; ESLD = end-stage liver disease; HR-QOL = health-related quality of life; IADL = independent activity of daily living; ICU = intensive care unit; NA = not available; OR = odds ratio; RCT = randomized, controlled trial; REACH = Resources Enhancing Alzheimer's Caregiver Health Project; UK = United Kingdom; USA = United States of America.

† All descriptions of the population are for the intervention group (if overall is not described), and differences with the control are indicated where appropriate.
