# Supplementary material
Source: HighWire-hosted journal article supplement (https://www.annals.org/content/suppl/2008/01/09/148.2.147)
Supplement: Lorenz_AT4_148-2-147-DC1-4.pdf [file Lorenz_AT4_148-2-147-DC1-4.pdf]

**Appendix Table 4. Continuity\***

| Author, Year (Reference); Country | Funding Source                                                             | Study Design and Quality                             | Population†                                                                                                                                                                                                                                                                                                                                                                                                      | Sampling Approach and Setting                                                                                                 | Intervention Description                                                                                                                                                                                                                                               | Control Description                                       | Time Point for Outcome Analysis | Outcomes                                                                               | Description of Results                                                                                                                                                                                                                                                   |
|-----------------------------------|----------------------------------------------------------------------------|------------------------------------------------------|------------------------------------------------------------------------------------------------------------------------------------------------------------------------------------------------------------------------------------------------------------------------------------------------------------------------------------------------------------------------------------------------------------------|-------------------------------------------------------------------------------------------------------------------------------|------------------------------------------------------------------------------------------------------------------------------------------------------------------------------------------------------------------------------------------------------------------------|-----------------------------------------------------------|---------------------------------|----------------------------------------------------------------------------------------|--------------------------------------------------------------------------------------------------------------------------------------------------------------------------------------------------------------------------------------------------------------------------|
| Ahrens et al., 2003 (119); USA    | Barnes-Jewish Foundation                                                   | Nonrandomized with comparison group<br><br>Jadad: NA | Number approached: Not reported<br><br>Number enrolled: 151 (43 intervention)<br>Number in analysis of results: 151<br>Age: mean years intervention 65 vs. 61 control<br>Gender : 51% intervention vs. 45% control<br>Race/ethnicity: intervention white 58% vs. control 60%<br>Disease: diverse<br>Severity: Patients clinically thought to be at high risk of dying according to judgment of intervention team | Consecutive patients at one hospital judged to be at high risk of death                                                       | A physician-nurse specialist team focused on improving communication in addition to ICU medical care delivery                                                                                                                                                          | Usual care as delivered by other ICU attending physicians | Not reported                    | Mortality, costs, and lengths of stay                                                  | ICU death was lower with reduced ICU LOS (6.1 vs. 9.5 days, p<0.01), hospital LOS (11.3 vs. 16.4 days, p=0.03) and direct hospital costs (\$15,559 vs. \$24,080)                                                                                                         |
| Coleman et al., 2006 (127); USA   | John A. Hartford Foundation, Paul Beeson Faculty Scholars in Aging Program | RCT<br><br>Jadad: 3                                  | Number approached: 2338<br><br>Number enrolled: 750 randomized<br>Number in analysis of results: 712<br>Age: mean 76 years<br>Gender: 48% female<br>Race/ethnicity: 88 % white, 5% black, 7% Hispanic (intervention, no difference with control)<br>Disease: 11 acute or chronic causes of hospitalization<br>Severity: chronic disease score 7 (intervention, no difference with control)                       | Nondemented, nonpsychiatric admissions from within a large not for profit capitated care system admitted to a single hospital | Assistance with medication self-management, patient-centered and maintained portable health record, facilitated primary care follow-up, and coaching for management of exacerbations. The intervention focused on contact during the first month following enrollment. | Usual care                                                | 30, 90, and 180 days            | Nonelective readmission, rehospitalization for the initial primary admission diagnosis | Intervention patients had lower rehospitalization rates at 30 (8.3% vs. 11.9%, p=0.48), 90 (16.7% vs. 22.5%, p=0.04), but not significantly different at 180 days (25.6% vs. 30.7%, p=0.28). Hospital costs were lower at all 3 time points among intervention patients. |
| Englehardt et al., 2006           | Robert Wood Johnson, Fan                                                   | RCT                                                  | Number approached: Not reported                                                                                                                                                                                                                                                                                                                                                                                  | Patient recruited from within 3 VA medical                                                                                    | Palliative care oriented care                                                                                                                                                                                                                                          | Usual care                                                | 3 and 6 month patient and 3     | Effectiveness of communication with                                                    | The intervention was associated with increased patient                                                                                                                                                                                                                   |

|                                  |                                                        |     |          |                                                                                                                                                                                                                                                                                                                                                 |                                                                                                                                 |                                                                                                                                                                                                                  |                                                                                                                 |                                                                                                                |                                                                                                                                                                                                                                                                                                                          |                                                                                                                                                      |
|----------------------------------|--------------------------------------------------------|-----|----------|-------------------------------------------------------------------------------------------------------------------------------------------------------------------------------------------------------------------------------------------------------------------------------------------------------------------------------------------------|---------------------------------------------------------------------------------------------------------------------------------|------------------------------------------------------------------------------------------------------------------------------------------------------------------------------------------------------------------|-----------------------------------------------------------------------------------------------------------------|----------------------------------------------------------------------------------------------------------------|--------------------------------------------------------------------------------------------------------------------------------------------------------------------------------------------------------------------------------------------------------------------------------------------------------------------------|------------------------------------------------------------------------------------------------------------------------------------------------------|
| (112); USA                       | Fox/Leslie R. Samuels, and Nathan Cummings Foundations |     | Jadad: 3 | Number enrolled: 275 randomized<br>Number in analysis of results: 275<br>Age: mean intervention 71 years<br>Gender: 81% male<br>Race/ethnicity: 88% white, 11% black, and 1% other<br>Disease: 63% cancer, 20% COPD, and 17% CHF<br>Severity: Other than cancer, patients all met criteria of 1 ICU or 2 hospitalizations in the prior 6 months | centers, one home care, and 2 managed care organizations                                                                        | coordination delivered by nurses, social workers                                                                                                                                                                 | month surrogate outcomes                                                                                        | providers, satisfaction, willingness to participate in treatment planning, advance directive completion, costs | satisfaction with care and communication, and surrogates reported fewer problems with provider support. More intervention patients completed advance directives (69% vs. 48%, p=0.006). Median time to AD completion was 46 vs. 238 days (p=0.02). There were no differences in survival and a trend toward lower costs. |                                                                                                                                                      |
| Goldberg et al., 2003 (120); USA | Alere Medical                                          | RCT | Jadad: 2 | Number approached: Not reported<br>Number enrolled: 280<br>Number in analysis of results: 278 (for mortality), 241 (other outcomes)<br>Age: mean years 59<br>Gender : 68% male<br>Race/ethnicity: intervention white 67% vs. control 61%<br>Disease: CHF<br>Severity: 75% NYHA class III and 25% class IV in both groups                        | Patients hospitalized with NYHA Class III or IV CHF or with an LVEF < 35%, at 8 community and 8 heart transplant centers in USA | AlereNet monitoring system and DayLink monitor including electronic scale, personalized symptom response system linked via phone to cardiac nurses at Alere, clinical data communicated to responsible physician | Usual care which often included heart failure programs (proportion and nature of control not further described) | Baseline, 2 week, 3 and 6 month clinical visits; mortality and utilization at 7 months                         | 180 day readmission rate, mortality, CHF readmission, ED visitation, HR-QOL, satisfaction                                                                                                                                                                                                                                | No differences in hospitalization, but lower mortality (11 intervention vs. 26 control deaths, p=0.003), no difference in HR-QOL by several measures |
| Goodyer et al., 1996 (125); UK   | Not reported                                           | RCT | Jadad: 2 | Number approached: Not reported<br>Number enrolled: 100<br>Number in analysis of results: 100<br>Age: mean years 65 intervention, 64                                                                                                                                                                                                            | Hospital-based geriatric clinic outpatients > 70 years of age with stable CHF                                                   | Education and counseling for appropriate medication usage                                                                                                                                                        | Usual care                                                                                                      | Baseline and approximately 8 weeks later                                                                       | Symptoms exercise testing, and clinical assessment                                                                                                                                                                                                                                                                       | Exercise testing and distance to breathlessness improved, along with medication knowledge in the intervention group.                                 |

|                                     |                                                                                       |                       |                                                                                                                                                                                                                                                                                                       |                                                                                                                                                                                |                                                                                                                                                                                                                            |                               |                                                                            |                                                                                          |                                                                                                                                                                                                                                   |
|-------------------------------------|---------------------------------------------------------------------------------------|-----------------------|-------------------------------------------------------------------------------------------------------------------------------------------------------------------------------------------------------------------------------------------------------------------------------------------------------|--------------------------------------------------------------------------------------------------------------------------------------------------------------------------------|----------------------------------------------------------------------------------------------------------------------------------------------------------------------------------------------------------------------------|-------------------------------|----------------------------------------------------------------------------|------------------------------------------------------------------------------------------|-----------------------------------------------------------------------------------------------------------------------------------------------------------------------------------------------------------------------------------|
|                                     |                                                                                       |                       | control<br>Gender : male 30% intervention, 24% control<br>Race/ethnicity: Not reported<br>Disease: CHF<br>Severity: Not reported                                                                                                                                                                      |                                                                                                                                                                                |                                                                                                                                                                                                                            |                               |                                                                            |                                                                                          |                                                                                                                                                                                                                                   |
| Gorski and Johnson, 2003 (121); USA | Not reported                                                                          | Uncontrolled pre-post | Number approached: 74 referrals                                                                                                                                                                                                                                                                       | Referrals from a large, integrated managed care program                                                                                                                        | CHF disease management program (based in a home care agency) including structured assessments, telephone contact, medication protocols, patient education, and depression follow-up – coordinated with a managed care plan | NA                            | Baseline program inception to 9 months                                     | Processes of care, satisfaction                                                          | Satisfaction was high, nurses intervened for aggressive fluid management 33 times in 22 patients                                                                                                                                  |
|                                     |                                                                                       | Jadad: NA             | Number enrolled: 74<br>Number in analysis of results: 51<br>Age: Mean years 74<br>Gender: Male 37%<br>Race/ethnicity: Not reported<br>Disease: CHF<br>Severity: Mostly advanced (50% NYHA class III)                                                                                                  |                                                                                                                                                                                |                                                                                                                                                                                                                            |                               |                                                                            |                                                                                          |                                                                                                                                                                                                                                   |
| Loeb et al., 2006 (126); Canada     | Canadian Institute of Health Research, Physicians Services, Inc Foundation of Ontario | Cluster RCT           | Number approached: 36 homes, 2513 residents                                                                                                                                                                                                                                                           | Residents 65 years of age and older who met a standardized definition of lower respiratory tract infection, excluding those with prior 'no hospitalization' advance directives | Clinical pathway using clinical nurses, radiography, intravenous treatment, and antibiotics in the nursing home                                                                                                            | Physician-directed usual care | Up to 30 days                                                              | Hospitalization and length of stay, emergency department visits, MDS 2.0 quality of life | The weighted mean reduction in hospitalization was 12% (95% CI, 5% to 18%, p=0.001). Rate of hospitalization in usual care was 22%. There were no differences in mortality, quality of life, or functional status between groups. |
|                                     |                                                                                       | Jadad: 3              | Number enrolled: 22 homes and 680 residents randomized<br>Number in analysis of results: 671 residents<br>Age: mean 85 years<br>Gender: 70% female<br>Race/ethnicity: not reported<br>Disease: Cancer, heart failure, cerebrovascular, and renal disease<br>Severity: severity of illness score, 0.63 |                                                                                                                                                                                |                                                                                                                                                                                                                            |                               |                                                                            |                                                                                          |                                                                                                                                                                                                                                   |
| Mann et al., 1999 (123); USA        | Administration on Aging, Andrus Foundation                                            | RCT                   | Number approached: Not reported                                                                                                                                                                                                                                                                       | Cognitively intact frail elders referred from community and hospital-based rehabilitation                                                                                      | In-home functional assessments and supportive training and follow-up from a nurse, OT, and                                                                                                                                 | Usual care                    | Baseline and every 6 months follow-up of function, health status, and cost | Function, pain, costs                                                                    | Both groups declined, but more so on the Functional Independent Measure in the control group (-2.12 vs -4.28), pain worsened more in the                                                                                          |

|                                      |                                                                                                  |                  |                                                                                                                                                                                                                                                                                                     |                                                                                                    |                                                                                                                                                                                                                                                                      |            |                                                                         |                                                                                                                                                    |                                                                                                                                                                                                                               |
|--------------------------------------|--------------------------------------------------------------------------------------------------|------------------|-----------------------------------------------------------------------------------------------------------------------------------------------------------------------------------------------------------------------------------------------------------------------------------------------------|----------------------------------------------------------------------------------------------------|----------------------------------------------------------------------------------------------------------------------------------------------------------------------------------------------------------------------------------------------------------------------|------------|-------------------------------------------------------------------------|----------------------------------------------------------------------------------------------------------------------------------------------------|-------------------------------------------------------------------------------------------------------------------------------------------------------------------------------------------------------------------------------|
|                                      |                                                                                                  |                  |                                                                                                                                                                                                                                                                                                     | services in Western NY                                                                             | technician                                                                                                                                                                                                                                                           |            | up to 18 months; monthly phone contact                                  |                                                                                                                                                    | control (0.03 vs. 2.05 on 0–20 point scale). Although in home treatment costs were higher, long term care utilization was lower among intervention participants.                                                              |
|                                      |                                                                                                  | Jadad: 3         | Number enrolled: 104<br>Number in analysis of results: 90<br>Age: mean years 70<br>Gender: male 30%<br>Race/ethnicity: white 71%<br>Disease: Diverse<br>Severity: Frail with mean number of chronic conditions of 6.5, days in hospital prior 6 months mean 5.3                                     |                                                                                                    |                                                                                                                                                                                                                                                                      |            |                                                                         |                                                                                                                                                    |                                                                                                                                                                                                                               |
| Melin and Bygren, 1992 (124); Sweden | Aldre Centrum Foundation, Stockholm County Council, and Central Stockholm Public Health District | RCT              | Number approached: 745                                                                                                                                                                                                                                                                              | Discharged patients from the internal medicine or orthopedics of the local general county hospital | Multidisciplinary physician led team including geriatrician and psychiatrist with 24 hour on call contact                                                                                                                                                            | Usual care | 6 months                                                                | Baseline and 6 month function, cognition. Social activity and contact, utilization                                                                 | Among approximately 75% of survivors in both groups, among the intervention vs. controls there was a greater improvement in IADL (4.9 vs. 3.2, p=0.04), walking ability, and slight improvement in overall medical condition. |
|                                      |                                                                                                  | Jadad: 2         | Number enrolled: 249<br>Number in analysis of results: 183<br>Age: mean years 80<br>Gender: male 29% intervention vs. 27% control<br>Race/ethnicity: Not reported<br>Disease: Diverse<br>Severity: Katz personal ADL mean at baseline 2.4 intervention vs. 2.3 control, and IADL 6.0 in both groups |                                                                                                    |                                                                                                                                                                                                                                                                      |            |                                                                         |                                                                                                                                                    |                                                                                                                                                                                                                               |
| Philbin et al., 2000 (122); USA      | VHA Empire State, NY State Department of Health                                                  | CCT of hospitals | Number approached: Not reported                                                                                                                                                                                                                                                                     | 10 acute care hospitals in upstate New York                                                        | Quality improvement intervention including inpatient critical pathway, ED critical pathway, implementation assistance from a consulting firm, provider education, patient and family educational aids, hospital-specific process and outcome benchmarks and feedback | Usual care | Hospitalization and posthospitalization quality of care; 6 month HR-QOL | 5 quality of care measures: LVEF evaluation, evaluation of primary clinical cause, dietary counseling, and 2 measures of ACEI prescription; HR-QOL | No difference in hospital-level outcomes analysis                                                                                                                                                                             |
|                                      |                                                                                                  | Jadad: NA        | Number enrolled: 10 hospitals<br>Number in analysis of results: 10                                                                                                                                                                                                                                  |                                                                                                    |                                                                                                                                                                                                                                                                      |            |                                                                         |                                                                                                                                                    |                                                                                                                                                                                                                               |

hospitals, 1402 preintervention and 1504 postintervention patients with CHF  
 Age: 74–77 mean years in all groups  
 Gender: Not reported  
 Race/ethnicity: 97–98% white in all groups  
 Disease: CHF  
 Severity: mean NYHA class 3.3-3.5 in all groups

|                                      |                                            |          |                                                                                                                                                                                                                                                                                               |                                                                                                                            |                                                                                       |            |                                          |                                                                                                                                           |                                                                                                                                                                                                                                         |
|--------------------------------------|--------------------------------------------|----------|-----------------------------------------------------------------------------------------------------------------------------------------------------------------------------------------------------------------------------------------------------------------------------------------------|----------------------------------------------------------------------------------------------------------------------------|---------------------------------------------------------------------------------------|------------|------------------------------------------|-------------------------------------------------------------------------------------------------------------------------------------------|-----------------------------------------------------------------------------------------------------------------------------------------------------------------------------------------------------------------------------------------|
| Schneiderman et al., 2000 (104); USA | Agency for Healthcare Policy and Research  | RCT      | Number approached: Not reported                                                                                                                                                                                                                                                               | Consecutive ICU patients at 1 US hospital referred by nurses who identified patients with potential value laden conflicts  | Ethics consultations by individuals with advanced training or experience in bioethics | Usual care | Following death or discharge (2–4 weeks) | Hospital and ICU days, use of life sustaining treatments, perceptions of experiences with care and consultation from providers and family | No difference in mortality, but reduced hospital and ICU days and lower use of life sustaining treatment. Most providers and patients found the experience helpful.                                                                     |
|                                      |                                            | Jadad: 2 | Number enrolled: 74<br>Number in analysis of results: 70<br>Age: Mean years, intervention 46 vs. control 52<br>Gender<br>Race/ethnicity: intervention white 40% vs. control 43%<br>Disease: Diverse<br>Severity: Advanced (60% of patients in both groups died in hospital)                   |                                                                                                                            |                                                                                       |            |                                          |                                                                                                                                           |                                                                                                                                                                                                                                         |
| Schneiderman et al., 2003 (103); USA | Agency for Healthcare Research and Quality | RCT      | Number approached: 551                                                                                                                                                                                                                                                                        | Consecutive ICU patients at 7 US hospitals referred by nurses who identified patients with potential value laden conflicts | Ethics consultations by individuals with advanced training or experience in bioethics | Usual care | Following death or discharge (1–2 weeks) | Hospital and ICU days, use of life sustaining treatments, perceptions of experiences with care and consultation from providers and family | No difference in mortality, but reduced hospital (–2.95 days, p=0.01) and ICU (–1.44, p=0.03) days and ventilatory support (–1.7 days, p=0.03) 87% of providers and surrogates agreed consultation was helpful in addressing conflicts. |
|                                      |                                            | Jadad: 3 | Number enrolled: 551<br>Number in analysis of results: 546<br>Age: mean years intervention 68 vs. control 68<br>Gender<br>Race/ethnicity: intervention white 63% vs. control 63%<br>Disease: Diverse<br>Severity: Advanced (63% of intervention and 58% of control patients died in hospital) |                                                                                                                            |                                                                                       |            |                                          |                                                                                                                                           |                                                                                                                                                                                                                                         |

\* ACEI = angiotensin-converting enzyme inhibitor; AD = advance directive; ADL = activity of daily living; CHF = congestive heart failure; ED = emergency department; HR-QOL = health-related quality of life; IADL = independent activity of daily living; ICU = intensive care unit; LOS = length of stay; LVEF = left ventricular ejection fraction; NA = not applicable; NYHA = New York Heart Association; RCT = randomized, controlled trial; UK = United Kingdom; USA = United States of America; VA = Veterans Administration.

† All descriptions of the population are for the intervention group (if overall is not described), and differences with the control are indicated where appropriate.
