# Supplementary material
Source: HighWire-hosted journal article supplement (https://www.annals.org/content/suppl/2008/01/09/148.2.147)
Supplement: Lorenz_AT5_148-2-147-DC1-5.pdf [file Lorenz_AT5_148-2-147-DC1-5.pdf]

**Appendix Table 5. Symptoms\***

| Author, Year (Reference); Country        | Symptom | Funding Source                                                       | Study Design and Quality               | Population                                                                                                                                                                                                                                    | Sampling Approach and Setting                                                                                                                                                                                                                                                                             | Intervention Description                                           | Control Description | Time Point for Outcome Analysis | Outcomes                                                                          | Description of Results                                                                                                                                                                                                                                                                                                                                        |
|------------------------------------------|---------|----------------------------------------------------------------------|----------------------------------------|-----------------------------------------------------------------------------------------------------------------------------------------------------------------------------------------------------------------------------------------------|-----------------------------------------------------------------------------------------------------------------------------------------------------------------------------------------------------------------------------------------------------------------------------------------------------------|--------------------------------------------------------------------|---------------------|---------------------------------|-----------------------------------------------------------------------------------|---------------------------------------------------------------------------------------------------------------------------------------------------------------------------------------------------------------------------------------------------------------------------------------------------------------------------------------------------------------|
| Abernethy et al., 2003 (68); Australia   | Dyspnea | Flinders Medical Centre Foundation, Doris Duke Charitable Foundation | Double-blind RCT<br><br>Jadad: 5       | Number approached: 87<br><br>Number enrolled: 48<br>Number included in analysis of results: 38<br>Age: 76 yrs<br>Gender: 73% male<br>Race/ethnicity: Not reported<br>Disease: COPD<br>Severity: Moderate to severe                            | Patients with dyspnea at rest who had not been previously treated with opioids and who had a serum creatinine within twice the normal range, stable needs for oxygen and medication, and the ability to fill out diary cards were recruited from four outpatient clinics at a hospital in South Australia | 20 mg oral morphine with sustained release                         | Placebo             | 4 days                          | Morning and evening measures of dyspnea using VAS, quality of sleep, constipation | Intervention patients reported an improvement in dyspnea of 6.6 mm in the morning and 9.5 mm in the evening (p=0.011 and p=0.006, respectively). When taking morphine, patients also reported better sleep (p=0.039) but more constipation (p=0.021). Sustained release, oral morphine at low dosages provided significant improvement in refractory dyspnea. |
| Benitez-Rosario et al., 2004 (56); Spain | Pain    | Not reported                                                         | Uncontrolled pre-post<br><br>Jadad: NA | Number approached: 560<br><br>Number enrolled: 17<br>Number included in analysis of results: 17<br>Age: mean years 63<br>Gender: 8/17 male<br>Race/ethnicity: Not reported<br>Disease: Cancer<br>Severity: Advanced on a palliative care unit | Consecutive patients who qualified for an opioid switching protocol when pain was not well controlled or when side effects were present                                                                                                                                                                   | Fentanyl to methadone protocol                                     | No control          | Baseline to day 6               | Pain intensity, side effects, opioid doses                                        | Delirium and myoclonus were reversed in most patients. Opioid rotation relieved pain in most patients (80–100%).                                                                                                                                                                                                                                              |
| Bruera et al., 1993 (49); Canada, Italy  | Pain    | Not reported                                                         | RCT with crossover<br><br>Jadad: 2     | Number approached: Not reported<br><br>Number enrolled: 10<br>Number included in analysis of results: 10<br>Age: Not reported<br>Gender: Not reported                                                                                         | Hospitalized patients with terminal cancer were consecutively enrolled in this study                                                                                                                                                                                                                      | Intermittent, subcutaneous injections of morphine every four hours | Placebo             | 24 hours                        | Dyspnea (VAS)                                                                     | After completion of the study, the patient blindly chose the morphine as more effective for relief of dyspnea. VAS scores for intervention patients were 19 ± 17 vs. 30 ± 26 at 30 minutes post-injection (p<0.02), 14 ± 18 vs. 32 ± 27 at 45 minutes post-injection (p<0.01), and 16 ± 18 vs. 35 ± 29 at 60 minutes post-injection (p<0.01).                 |

|                                                                                      |            |                                                                                           |                       |                                                                                                                                                                                                                                                                                                |                                                                                                                                                             |                                                                                                  |                                                                             |                                                                                  |                                                             |                                                                                                                                                                                                                                                                                                                                                                                                         |
|--------------------------------------------------------------------------------------|------------|-------------------------------------------------------------------------------------------|-----------------------|------------------------------------------------------------------------------------------------------------------------------------------------------------------------------------------------------------------------------------------------------------------------------------------------|-------------------------------------------------------------------------------------------------------------------------------------------------------------|--------------------------------------------------------------------------------------------------|-----------------------------------------------------------------------------|----------------------------------------------------------------------------------|-------------------------------------------------------------|---------------------------------------------------------------------------------------------------------------------------------------------------------------------------------------------------------------------------------------------------------------------------------------------------------------------------------------------------------------------------------------------------------|
|                                                                                      |            |                                                                                           |                       | Race/ethnicity: Not reported<br>Disease: Cancer<br>Severity: Terminal                                                                                                                                                                                                                          |                                                                                                                                                             |                                                                                                  |                                                                             |                                                                                  |                                                             |                                                                                                                                                                                                                                                                                                                                                                                                         |
| Bruera et al., 2003 (66); USA, Serbia, Chile, Colombia, Argentina, Brazil, Australia | Dyspnea    | Not reported                                                                              | RCT with crossover    | Number approached: Not reported<br><br>Jadad: 5<br>Number enrolled: 34<br>Number included in analysis of results: 33<br>Age: mean years 64<br>Gender: male 21/33<br>Race/ethnicity: Not reported<br>Disease: Cancer (31 with lung cancer)<br>Severity: Locally recurrent or metastatic disease | Consecutive patients with cancer attending an outpatient thoracic center                                                                                    | Oxygen given for 5 minutes and then during exercise                                              | Air                                                                         | Baseline and immediate                                                           | Subjective dyspnea intensity and walking ability            | No difference in dyspnea, fatigue, or distance walked at 3 or 6 minutes.                                                                                                                                                                                                                                                                                                                                |
| Bruera et al., 2004 (50)                                                             | Pain       | Brown Foundation                                                                          | RCT                   | Number approached: 152<br><br>Jadad: 5<br>Number enrolled: 103<br>Number included in analysis of results: 66<br>Age: 26–87 years<br>Gender: male intervention 67% vs. 61% control<br>Race/ethnicity: Not reported<br>Disease: Cancer<br>Severity: Advanced in palliative care clinics          | Patients in palliative care clinics recruited from 7 international sites with poor pain control, normal renal function, and a prognosis of at least 4 weeks | Oral methadone with structured clinical assessment and dose titration                            | Long-acting morphine with structured clinical assessment and dose titration | Baseline, and daily monitoring, with in person assessments on days 8, 15, and 22 | Pain and side effects                                       | Pain was similar (≈8) in both groups at baseline. Constipation was similar in both groups at all times, but opioid toxicities were higher in the methadone group (11 withdrawals vs. 3, p=0.02) Methadone sedation peaked on day 4–5, with morphine on day 2–3. About half of patients in both groups reported a pain response of 20% or more, and 2/3 reported worsening of toxicities of 20% or more. |
| Chochinov et al., 2005 (74); Canada, Australia                                       | Depression | Cancer Council of Western Australia, American Foundation for Suicide Prevention, National | Uncontrolled pre–post | Number approached: Not reported                                                                                                                                                                                                                                                                | Patients registered with palliative care services in Winnipeg, Canada, and Perth, Australia                                                                 | Dignity therapy administered by a psychiatrist, palliative care nurses, or psychologists using a | NA                                                                          | Baseline and approximately one week                                              | Qualitative analysis and single item screening for symptoms | 91% of participants were satisfied with the intervention, and 76% reported heightened dignity, 68% increased sense of purpose, 67% heightened sense of meaning, 47% increased will to live, and 81% it was of help to family. Many symptom scores improved, especially for psychosocial symptoms.                                                                                                       |

|                                       |               |                                                                                |                    |           |                                                                                                                                                                                                                  |                                                                                                                                                                                                                                                    |                                                                               |            |                                                                                            |                                                                                                                                                                                                                    |                                                                                                                                                                                                                                                                                                                                                                                                                                                            |
|---------------------------------------|---------------|--------------------------------------------------------------------------------|--------------------|-----------|------------------------------------------------------------------------------------------------------------------------------------------------------------------------------------------------------------------|----------------------------------------------------------------------------------------------------------------------------------------------------------------------------------------------------------------------------------------------------|-------------------------------------------------------------------------------|------------|--------------------------------------------------------------------------------------------|--------------------------------------------------------------------------------------------------------------------------------------------------------------------------------------------------------------------|------------------------------------------------------------------------------------------------------------------------------------------------------------------------------------------------------------------------------------------------------------------------------------------------------------------------------------------------------------------------------------------------------------------------------------------------------------|
|                                       |               | Cancer Institute of Canada, Canadian Cancer Society                            |                    | Jadad: NA | Number enrolled: 181<br>Number included in analysis of results: 100<br>Age: mean years 63.9<br>Gender: Not reported<br>Race/ethnicity: Not reported<br>Disease: Diverse<br>Severity: Terminal illness            |                                                                                                                                                                                                                                                    |                                                                               |            | structured interview to construct a "generativity document" provided to family and friends |                                                                                                                                                                                                                    |                                                                                                                                                                                                                                                                                                                                                                                                                                                            |
| Detmar et al., 2003 (48); Netherlands | Pain, dyspnea | Dutch Cancer Society                                                           | RCT with crossover | Jadad: 2  | Number approached: 382<br>Number enrolled: 273 patients<br>Number included in analysis of results: 214<br>Age: 57 y<br>Gender: 24% male<br>Race/ethnicity: Not reported<br>Disease: Cancer<br>Severity: Advanced | Patients were identified through 10 oncologists at the Antoni van Leeuwenhoek Hospital, a cancer hospital in Amsterdam, Netherlands. Consecutive patients receiving outpatient palliative chemotherapy were approached to participate in the study | HR-QOL assessments                                                            | Usual care | 3 successive outpatient visits                                                             | Patient-physician communication rated based on the Dartmouth Primary Care Cooperative Information Functional Health Assessment and the World Health Organization Project of National Colleges and Academics charts | The HR-QOL-related issues were discussed significantly more frequently in the intervention than in the control group. Physicians in the intervention group identified a greater percentage of patients with moderate-to-severe health problems in several HR-QOL domains than did those in the control group. All physicians and 87% of the patients believed that the intervention facilitated communication and expressed interest in its continued use. |
| Gottlieb et al., 1999 (70); USA       | Dyspnea       | National Institute of Aging, Claude Pepper Older Americans Independence Center | RCT                | Jadad: 2  | Number approached: Not reported<br>Number enrolled: 33<br>Number included in analysis of                                                                                                                         | Patients with CHF on stable medications for at least one month                                                                                                                                                                                     | An exercise program with 6 months of supervised aerobic training 3 times/week | Usual care | Baseline and 6 month                                                                       | Exercise tolerance, oxygen consumption, and quality of life, symptoms, and functional status                                                                                                                       | 6/17 intervention patients did not tolerate the program. Six-minute walk increased by 194 feet among those who completed the intervention, but quality of life did not change.                                                                                                                                                                                                                                                                             |

results: 25  
 Age: mean years intervention 67 years vs. 64 controls  
 Gender: male 0/11 intervention vs. 3/11 control  
 Race/ethnicity: white intervention 3/11 vs. 4/14 control  
 Disease: CHF  
 Severity: NYHA class II and III

|                                            |                           |                                  |                       |                                                                                                                                                                                                                                                 |                                                                                                                                                                                           |                                                                                                                     |                            |                                                                                                              |                                                                                                                                                                                      |                                                                                                                                                                                                                                                                                                                                                                                                                                                                                                                                      |
|--------------------------------------------|---------------------------|----------------------------------|-----------------------|-------------------------------------------------------------------------------------------------------------------------------------------------------------------------------------------------------------------------------------------------|-------------------------------------------------------------------------------------------------------------------------------------------------------------------------------------------|---------------------------------------------------------------------------------------------------------------------|----------------------------|--------------------------------------------------------------------------------------------------------------|--------------------------------------------------------------------------------------------------------------------------------------------------------------------------------------|--------------------------------------------------------------------------------------------------------------------------------------------------------------------------------------------------------------------------------------------------------------------------------------------------------------------------------------------------------------------------------------------------------------------------------------------------------------------------------------------------------------------------------------|
| Grande et al., 1999 (42) and 2000 (41); UK | Pain, dyspnea, depression | Elizabeth Clark Charitable Trust | RCT                   | Number approached: 262                                                                                                                                                                                                                          | Patients age 15 and older residing in the Cambridge Health District with a prognosis of two weeks or less to live or who requires respite care for cancer, motor neuron disease, and AIDS | Cambridge Hospital at Home (CHAH) palliative care service—provides up to 24 hour practical nursing care in the home | Usual care                 | 2 weeks intervention plus up to six week follow-up with caregivers, general practitioner, and district nurse | Patient satisfaction, pain, vomiting, nausea, constipation, diarrhea, dyspnea, anxiety, depression, health care utilization, caregiver satisfaction, likelihood of remaining at home | CHAH did not increase the likelihood that the patient would remain at home until death; however, the intervention was associated with fewer general practitioner after-hours visits. All respondents (caregivers, GPs, and nurses) rated CHAH better than usual care but for different reasons. Nurses felt it was better in terms of handling night care and caregiver support, GPs felt it did a better job of treating anxiety and depression, and caregivers felt that the program did a better job of managing pain and nausea. |
|                                            |                           |                                  | Jadad: 3              | Number enrolled: 241<br>Number included in analysis of results: 229<br>Age: 72 y<br>Gender: 50% male<br>Race/ethnicity: Not reported<br>Disease: Mostly cancer (87%)<br>Severity: Terminal                                                      |                                                                                                                                                                                           |                                                                                                                     |                            |                                                                                                              |                                                                                                                                                                                      |                                                                                                                                                                                                                                                                                                                                                                                                                                                                                                                                      |
| Grosset et al., 2005 (53); USA             | Pain                      | Purdue Pharmaceutical            | RCT with crossover    | Number approached: Not reported                                                                                                                                                                                                                 | Patients with persistent cancer (80%) or noncancer (20%) opioid-requiring pain at 37 U.S. clinical sites                                                                                  | Long-acting hydromorphone                                                                                           | Short-acting hydromorphone | Baseline and daily for 4–22 days                                                                             | Pain intensity (mean for 2 days at end of each double blind period), rescue medications, and adverse events                                                                          | The results of two identically conducted studies are described as one. In each study (and combined) there was no significant difference in analgesic efficacy. 27% of patients in both groups discontinued therapy due to side effects— notably sedation, constipation, nausea, or confusion.                                                                                                                                                                                                                                        |
|                                            |                           |                                  | Jadad: 4              | Number enrolled: 344<br>Number included in analysis of results: 217<br>Age: mean years 58<br>Gender: male 48%<br>Race/ethnicity: white 88%<br>Disease: 80% with cancer, of those who did not, most had osteoarthritis<br>Severity: Not reported |                                                                                                                                                                                           |                                                                                                                     |                            |                                                                                                              |                                                                                                                                                                                      |                                                                                                                                                                                                                                                                                                                                                                                                                                                                                                                                      |
| Jack et al., 2003 (34); UK                 | Pain                      | Not reported                     | Nonequivalent control | Number approached: Not reported                                                                                                                                                                                                                 | Any patients admitted to a large general hospital in northwest UK                                                                                                                         | Hospital palliative care                                                                                            | Usual care                 | 7 days                                                                                                       | Pain, anorexia, nausea,                                                                                                                                                              | Both groups showed significant improvement in symptoms, however                                                                                                                                                                                                                                                                                                                                                                                                                                                                      |

|                                   |               |                                                                                                              |              |                                                                                                                                                                                                                                                          |                                                                                                                                                             |                                                                                                                                                                                                                                |                   |                                                                    |                                                                                                                                                        |                                                                                                                                                                                |
|-----------------------------------|---------------|--------------------------------------------------------------------------------------------------------------|--------------|----------------------------------------------------------------------------------------------------------------------------------------------------------------------------------------------------------------------------------------------------------|-------------------------------------------------------------------------------------------------------------------------------------------------------------|--------------------------------------------------------------------------------------------------------------------------------------------------------------------------------------------------------------------------------|-------------------|--------------------------------------------------------------------|--------------------------------------------------------------------------------------------------------------------------------------------------------|--------------------------------------------------------------------------------------------------------------------------------------------------------------------------------|
|                                   |               |                                                                                                              | group design |                                                                                                                                                                                                                                                          |                                                                                                                                                             | team consisting of four clinical nurse specialists, supported by a consultant and a specialist registrar; intervention was focused on individualized assessment, advice, psychological support, symptom control and evaluation |                   |                                                                    | constipation, insomnia                                                                                                                                 | improvements were small. The intervention group showed greater improvement across all symptoms, particularly for pain and anorexia.                                            |
|                                   |               |                                                                                                              | Jadad: 1     | Number enrolled: 124<br>Number included in analysis of results: 100 (50 intervention/50 control)<br>Age: 66.8 yrs<br>Gender: 58% Male<br>Race/ethnicity: Not reported<br>Disease: Cancer (primarily lung and colorectal)<br>Severity: 32% had metastases |                                                                                                                                                             |                                                                                                                                                                                                                                |                   |                                                                    |                                                                                                                                                        |                                                                                                                                                                                |
| Jordhoy et al., 2002 (45); Norway | Pain, dyspnea | Norwegian Cancer Society, Norwegian Medical Association Fund for Quality Improvement, Swedish Cancer Society | CCT          | Number approached: Not reported                                                                                                                                                                                                                          | Health care districts were randomized. Patients in those districts with advanced cancer and a prognosis of 2 to 9 months to live were included in the study | A palliative care program that included a hospital-based palliative medicine unit (PMU), a PMU consultant team, and community-based palliative care providers                                                                  | Conventional care | Median 99 days in intervention group and 127 days in control group | Quality of life measures: physical and emotional functioning, pain, psychological distress (using the EORTC QLQ-C30), and Impact of Event (IES) scale. | The patients enrolled in the intervention PMU program showed no differences in quality of life measured through the EORTC QLQ-C30 or the IES as compared to conventional care. |
|                                   |               |                                                                                                              | Jadad: 3     | Number enrolled: 434<br>Number included in analysis of results: 434<br>Age: 70 yrs<br>Gender: 56% Male<br>Race/ethnicity: Not reported                                                                                                                   |                                                                                                                                                             |                                                                                                                                                                                                                                |                   |                                                                    |                                                                                                                                                        |                                                                                                                                                                                |

|                                     |                  |                                                                               |                    |                                                                                                                                                                                                                                                             |                                                                                                                                                                                                                                                                                                                                                         |                                                                                                                   |                                                        |                                                                 |                                                                                                                      |                                                                                                                                                                                                                                                                                                                                                                 |
|-------------------------------------|------------------|-------------------------------------------------------------------------------|--------------------|-------------------------------------------------------------------------------------------------------------------------------------------------------------------------------------------------------------------------------------------------------------|---------------------------------------------------------------------------------------------------------------------------------------------------------------------------------------------------------------------------------------------------------------------------------------------------------------------------------------------------------|-------------------------------------------------------------------------------------------------------------------|--------------------------------------------------------|-----------------------------------------------------------------|----------------------------------------------------------------------------------------------------------------------|-----------------------------------------------------------------------------------------------------------------------------------------------------------------------------------------------------------------------------------------------------------------------------------------------------------------------------------------------------------------|
|                                     |                  |                                                                               |                    | Disease: Cancer<br>Severity: Advanced                                                                                                                                                                                                                       |                                                                                                                                                                                                                                                                                                                                                         |                                                                                                                   |                                                        |                                                                 |                                                                                                                      |                                                                                                                                                                                                                                                                                                                                                                 |
| Latimer et al., 1998 (35); Canada   | Pain, depression | Hamilton Civic Hospitals                                                      | Design: RCT        | Number approached: 61                                                                                                                                                                                                                                       | All patients under palliative care services in the hospital. Eligibility criteria: knowledge of diagnosis, goals of treatment and prognosis; prognosis estimated to be 2 months or more; physical and emotional status assessed as adequate to participate; 18 years and older; able to read and write English; able to consent to participate in study | Introducing intervention patients to the Patient Care Travelling Record, a passport-like health care summary      | Usual care                                             | 2 months                                                        | Pain, mood, health care utilization, and patient satisfaction                                                        | With the exception of patients over 65 years of age, patients using the Patient Care Travelling Record reported decreased levels of uncertainty on follow-up. There was no additional use of health care services, no differences in mood states, pain relieve, or satisfaction with health care.                                                               |
|                                     |                  |                                                                               | Jadad: 2           | Number enrolled: 46<br>Number included in analysis of results: 26 baseline, 21 follow-up<br>Age: 54.6 yrs<br>Gender: 50% Male<br>Race/ethnicity: Not reported<br>Disease: Not reported<br>Severity: Not reported                                            |                                                                                                                                                                                                                                                                                                                                                         |                                                                                                                   |                                                        |                                                                 |                                                                                                                      |                                                                                                                                                                                                                                                                                                                                                                 |
| Lewith et al., 2004 (69); UK        | Dyspnea          | Dr. Susil Kumar and Jamila Mitra Charitable Trust, Garfield Weston Foundation | RCT with crossover | Number approached: 81                                                                                                                                                                                                                                       | Patients with cystic fibrosis, COPD, or pulmonary fibrosis recruited from inpatient and outpatient respiratory disease clinics at University of Southampton and general practice clinics                                                                                                                                                                | Acupuncture                                                                                                       | Mock TENS                                              | Baseline and daily for 9 weeks                                  | Daily diary report of worst breathlessness (10 mm VAS); satisfaction with treatment, dyspnea-related quality of life | Both TENS and acupuncture led to equivalent improvement in breathlessness.                                                                                                                                                                                                                                                                                      |
|                                     |                  |                                                                               | Jadad:             | Number enrolled: 36<br>Number included in analysis of results: 30 (phase 1), 24 (phase 2)<br>Age: mean years 66.6<br>Gender: male 16/36<br>Race/ethnicity: Not reported<br>Disease: cystic fibrosis, COPD, and pulmonary fibrosis<br>Severity: Not reported |                                                                                                                                                                                                                                                                                                                                                         |                                                                                                                   |                                                        |                                                                 |                                                                                                                      |                                                                                                                                                                                                                                                                                                                                                                 |
| Maringelli et al., 2004 (52); Italy | Pain             | Not reported                                                                  | RCT                | Number approached: Not reported                                                                                                                                                                                                                             | Patients recruited from one clinical site receiving home palliative care                                                                                                                                                                                                                                                                                | Initiation of WHO pain ladder Step 3 "strong opioids" (e.g., morphine) for average pain of <7/10 in the past week | Initiation of Step 1 or 2 WHO pain ladder medications. | Patients were treated for an average of approximately 10 weeks. | HR-QOL, side effects, satisfaction, tolerability, performance status                                                 | Patients had better overall pain relief (-2.6 vs. -1.9, p=0.041) in the intervention group, and quality of life and performance status were similar. Treatment may have achieved satisfactory results slightly earlier in the group started on strong opioids (59.3% of weeks without a therapeutic change intervention vs. 48.9% without a change in control). |
|                                     |                  |                                                                               | Jadad: 2           | Number enrolled: 100<br>Number included in analysis of results: 92                                                                                                                                                                                          |                                                                                                                                                                                                                                                                                                                                                         |                                                                                                                   |                                                        |                                                                 |                                                                                                                      |                                                                                                                                                                                                                                                                                                                                                                 |

|                                          |               |                                            |                                 |                                                                                                                                                                                                                              |                                                                                                                                                              |                                                                                                                                                                                                                                                                                                      |            |                                                   |                                                                                                      |                                                                                                                                                                                                                                                                                                                                                                                                               |
|------------------------------------------|---------------|--------------------------------------------|---------------------------------|------------------------------------------------------------------------------------------------------------------------------------------------------------------------------------------------------------------------------|--------------------------------------------------------------------------------------------------------------------------------------------------------------|------------------------------------------------------------------------------------------------------------------------------------------------------------------------------------------------------------------------------------------------------------------------------------------------------|------------|---------------------------------------------------|------------------------------------------------------------------------------------------------------|---------------------------------------------------------------------------------------------------------------------------------------------------------------------------------------------------------------------------------------------------------------------------------------------------------------------------------------------------------------------------------------------------------------|
|                                          |               |                                            |                                 | Age: mean years 64 intervention vs. 61 controls<br>Gender: male intervention 57% vs. 63% control<br>Race/ethnicity: Not reported<br>Disease: Cancer<br>Severity: Late stage, no longer receiving disease-modifying treatment |                                                                                                                                                              |                                                                                                                                                                                                                                                                                                      |            |                                                   |                                                                                                      |                                                                                                                                                                                                                                                                                                                                                                                                               |
| Mazzocato et al., 1999 (57); Switzerland | Pain, dyspnea | Not reported                               | Double-blind RCT with crossover | Number approached: 10<br><br>Jadad: 2                                                                                                                                                                                        | Patients with advanced cancer with no brain tumor or acute incapacitating respiratory decompensation admitted to the hospital                                | 5 mg subcutaneous morphine                                                                                                                                                                                                                                                                           | Placebo    | 24 hours with crossover for second 24-hour period | Dyspnea rating using VAS, modified Borg scale, pain rating using VAS, somnolence, anxiety            | Mean changes in dyspnea 45 minutes following injection were $-25 \pm 10$ mm and $-1.2 \pm 1.2$ points for morphine versus $0.6 \pm 7.7$ mm ( $P<0.01$ ) and $-0.1 \pm 0.3$ points ( $P=0.03$ ) for placebo on VAS and Borg scales, respectively. No relevant changes in other outcomes were observed. Morphine was effective for cancer dyspnea and did not compromise respiratory function at the dose used. |
| McDonald et al., 2005 (51); USA          | Pain          | Agency for Healthcare Research and Quality | 3-arm CCT                       | Number approached: 1729 patients                                                                                                                                                                                             | Home health nurses working for a large, non-profit urban home health agency and their adult cancer patients who reported daily or constant pain on admission | Nurses and their patients were randomized to receive a) (limited intervention) evidence based patient-specific email reminders of recommended cancer pain management practices or b) (extensive intervention) that combined with expert consultation with a clinical nurse specialist in cancer pain | Usual care | Baseline to 45 days                               | Processes of care from chart abstraction, patient pain, functioning, and health status, cost of care | Nursing care processes were not significantly influenced, although patients in the extensive intervention reported lower "pain at its worst" and patients in the limited intervention reported better "pain on average" vs. the control. There was a trend towards benefit across a range of pain and symptom measures, although the differences were small in magnitude.                                     |

|                                     |      |              |                       |                                                                                                                                                                                                                                                                      |                                                                                                                                  |                                                                                                                       |                                                    |                                                                           |                                                                                         |                                                                                                                                                                                                                                                                                                                                                                                                                                                                               |
|-------------------------------------|------|--------------|-----------------------|----------------------------------------------------------------------------------------------------------------------------------------------------------------------------------------------------------------------------------------------------------------------|----------------------------------------------------------------------------------------------------------------------------------|-----------------------------------------------------------------------------------------------------------------------|----------------------------------------------------|---------------------------------------------------------------------------|-----------------------------------------------------------------------------------------|-------------------------------------------------------------------------------------------------------------------------------------------------------------------------------------------------------------------------------------------------------------------------------------------------------------------------------------------------------------------------------------------------------------------------------------------------------------------------------|
|                                     |      |              | Jadad: NA             | Number enrolled: 336 nurses and their 1284 patients<br>Number included in analysis of results: 673 patients<br>Age: mean years 63<br>Gender: female 65%<br>Race/ethnicity: white, non-Hispanic 30%<br>Disease: Cancer<br>Severity: Mean of 2.4 years after diagnosis |                                                                                                                                  | with additional educational materials                                                                                 |                                                    |                                                                           |                                                                                         |                                                                                                                                                                                                                                                                                                                                                                                                                                                                               |
| Mercadante et al., 2002 (36); Italy | Pain | Not reported | RCT                   | Number approached: 156                                                                                                                                                                                                                                               | Patients with advanced cancer were consecutively enrolled in the study with in-home follow-up                                    | After one week of opioid stabilization, patients were randomized to receive ketorolac in addition to opioid treatment | Opioid escalation only according to clinical needs | Mean 24 days follow-up in intervention group and 32 days in control group | Pain, nausea, vomiting, daytime drowsiness, confusion, constipation, gastric discomfort | Patients who received ketorolac in addition to opioid treatment showed a better analgesia after a week in comparison to the group treated with opioids only. Thereafter, opioid escalation was slower and the maximum opioid dose was lower in the group treated with ketorolac. The incidence and severity of gastric discomfort were more evident in patients treated with ketorolac, while constipation was significantly increased in patients who received opioids only. |
|                                     |      |              | Jadad: 3              | Number enrolled: 50<br>Number included in analysis of results: 47<br>Age: 62.6 yrs<br>Gender: 53% male<br>Race/ethnicity: Not reported<br>Disease: Cancer<br>Severity: Advanced                                                                                      |                                                                                                                                  |                                                                                                                       |                                                    |                                                                           |                                                                                         |                                                                                                                                                                                                                                                                                                                                                                                                                                                                               |
| Mercadante et al., 2004 (54); Italy | Pain | Not reported | Pre-post uncontrolled | Number approached: 29                                                                                                                                                                                                                                                | Cancer patients with difficult to control pain manifest by an increased dosage of >100% in prior week, but persistent pain >4/10 | Patients on morphine switched to fentanyl, oral methadone and patients on fentanyl had morphine added                 | NA                                                 | Baseline to 5 weeks                                                       | Pain, side effects, functional status                                                   | Adding a second opioid generally allowed better pain control as well as a break in opioid escalation.                                                                                                                                                                                                                                                                                                                                                                         |
|                                     |      |              | Jadad: NA             | Number enrolled: 14<br>Number included in analysis of results: 14<br>Age: mean years 62<br>Gender: 9/14 men<br>Race/ethnicity: Not reported                                                                                                                          |                                                                                                                                  |                                                                                                                       |                                                    |                                                                           |                                                                                         |                                                                                                                                                                                                                                                                                                                                                                                                                                                                               |

|                                     |                           |                                                  |                       | Disease: Cancer                      |                                                                                                                                                                                                                            |                                                                                                                                                                                                         |            |                                          |                                                                                                                                                                          |                                                                                                                                                                                                                                                                                                                                                                                                                                                                                                                   |  |
|-------------------------------------|---------------------------|--------------------------------------------------|-----------------------|--------------------------------------|----------------------------------------------------------------------------------------------------------------------------------------------------------------------------------------------------------------------------|---------------------------------------------------------------------------------------------------------------------------------------------------------------------------------------------------------|------------|------------------------------------------|--------------------------------------------------------------------------------------------------------------------------------------------------------------------------|-------------------------------------------------------------------------------------------------------------------------------------------------------------------------------------------------------------------------------------------------------------------------------------------------------------------------------------------------------------------------------------------------------------------------------------------------------------------------------------------------------------------|--|
|                                     |                           |                                                  |                       | Severity: Not reported               |                                                                                                                                                                                                                            |                                                                                                                                                                                                         |            |                                          |                                                                                                                                                                          |                                                                                                                                                                                                                                                                                                                                                                                                                                                                                                                   |  |
| Rabow et al., 2004 (37); USA        | Pain, dyspnea, depression | Robert Wood Johnson Foundation                   | CCT                   | Number approached: 330/ 231 eligible | Patients referred by their physicians from one of two general medicine outpatient clinics. Inclusion criteria: physician believed patient had 1–5 years to live but not ready for hospice                                  | Primary care physicians in intervention group clinic received multiple palliative care team consultations. Patients received advance care planning, psychosocial support, and family caregiver training | Usual care | 12 months                                | Degree dyspnea interferes, frequency dyspnea limits activities, sleep, spirituality, health care costs, pain, quality of life, anxiety, depression, patient satisfaction | Patients in the intervention clinic had less dyspnea and anxiety, and improved sleep quality and spiritual well being than control clinic patients. There were no differences in pain, depression, quality of life or satisfaction with care between the two groups. Intervention patients had decreased primary care and urgent care visits without an increase in ED visits, specialty clinic visits, hospitalizations, or days in the hospital. There were no differences in total charges between the groups. |  |
|                                     |                           |                                                  |                       | Jadad: 3                             | Number enrolled: 90<br>Number included in analysis of results: 66<br>Age: 68.6 yrs<br>Gender: 36% male<br>Race/ethnicity: 53% White<br>Disease: CHF, COPD, or cancer<br>Severity: Advanced                                 |                                                                                                                                                                                                         |            |                                          |                                                                                                                                                                          |                                                                                                                                                                                                                                                                                                                                                                                                                                                                                                                   |  |
| Rodrigues et al., 2004 (55); Brazil | Pain                      | Not reported                                     | Pre–post uncontrolled | Number approached: Not reported      | Not reported                                                                                                                                                                                                               | Clodronate                                                                                                                                                                                              | NA         | Baseline up to 4–6 months                | Metastases, skeletal events, pain                                                                                                                                        | Pain was reported to improve on average from 7.4 (range 2–8) before to 2.4 (range 0–7) after the course of treatment.                                                                                                                                                                                                                                                                                                                                                                                             |  |
|                                     |                           |                                                  |                       | Jadad: NA                            | Number enrolled: 58<br>Number included in analysis of results: 58<br>Age: mean years 70<br>Gender: Not reported<br>Race/ethnicity: Not reported<br>Disease: Prostate cancer<br>Severity: Metastatic and hormone refractory |                                                                                                                                                                                                         |            |                                          |                                                                                                                                                                          |                                                                                                                                                                                                                                                                                                                                                                                                                                                                                                                   |  |
| Sarna et al., 1998 (46); USA        | Pain, dyspnea             | Tobacco-related disease research program of UCLA | RCT                   | Number approached: 60                | Consecutive patients at 5 oncology practices in Southern California                                                                                                                                                        | Patients were screened for symptoms, and intervention patients had those results communicated to the office-based nurse                                                                                 | Usual care | Baseline, and with visits up to 6 months | Symptoms score                                                                                                                                                           | No differences in symptoms noted among intervention and control patients.                                                                                                                                                                                                                                                                                                                                                                                                                                         |  |

|                                           |      |                             |                  |                                                                                                                                                                                                                    |                                                                                                                                                                  |                                                                                                                                                                                                                                                            |            |          |                                                           |                                                                                                                                                                                                                                                                                                                                                                                                                                                                                                                                        |
|-------------------------------------------|------|-----------------------------|------------------|--------------------------------------------------------------------------------------------------------------------------------------------------------------------------------------------------------------------|------------------------------------------------------------------------------------------------------------------------------------------------------------------|------------------------------------------------------------------------------------------------------------------------------------------------------------------------------------------------------------------------------------------------------------|------------|----------|-----------------------------------------------------------|----------------------------------------------------------------------------------------------------------------------------------------------------------------------------------------------------------------------------------------------------------------------------------------------------------------------------------------------------------------------------------------------------------------------------------------------------------------------------------------------------------------------------------------|
|                                           |      |                             | Jadad: 2         | Number enrolled: 48<br>Number included in analysis of results: 48–21<br>Age: mean years 62<br>Gender: 24/49 male<br>Race/ethnicity: 34/49 white<br>Disease: Lung cancer<br>Severity: Stage III or IV               |                                                                                                                                                                  |                                                                                                                                                                                                                                                            |            |          |                                                           |                                                                                                                                                                                                                                                                                                                                                                                                                                                                                                                                        |
| Simmons et al., 2002 (38); USA            | Pain | NIH/NIA, Claude Pepper OAIC | RCT              | Number approached: 157/ 113 met inclusion criteria                                                                                                                                                                 | Nursing home residents from a single, nonprofit, community nursing home (194 beds) with incontinence participating in a larger study to improve daily continence | Residents in the intervention group were prompted to toilet every two hours and before or after incontinence care, staff provided appropriate assistance to residents to walk or to wheel their chairs, and to repeat sit to stand movements up to 8 times | Usual care | 32 weeks | Geriatric pain measure, physical mobility                 | Residents did not report significant changes in pain attributable to exercise despite significant improvements in physical performance.                                                                                                                                                                                                                                                                                                                                                                                                |
|                                           |      |                             | Jadad: 1         | Number enrolled: 70<br>Number included in analysis of results: 51<br>Age: 89.9 yrs<br>Gender: 7% Male in intervention, 8% Male in control<br>Race/ethnicity: 96% White<br>Disease: Mixed<br>Severity: Not reported |                                                                                                                                                                  |                                                                                                                                                                                                                                                            |            |          |                                                           |                                                                                                                                                                                                                                                                                                                                                                                                                                                                                                                                        |
| Sittl et al., 2003 (43); Germany, Austria | Pain | Grunenthal GmbH             | Double-blind RCT | Number approached: Not reported                                                                                                                                                                                    | Patients age 18 and older with chronic, severe pain related to cancer or other diseases were enrolled. Setting was not specified                                 | Transdermal delivery system (TDS) for buprenorphine—three intervention groups using different dosages: 35.0 µg/h, 52.5 µg/h, and 70.0                                                                                                                      | Placebo    | 15 days  | Pain, intake of extra doses of analgesics, pain intensity | Buprenorphine TDS was associated with significantly higher response rates than placebo. At the 35.0 and 52.5 µg/h doses, the differences were significant: 36.6% and 47.5%, respectively vs. 16.2% for the placebo group (p<0.05). Higher dosage (70.0 µg/h) had higher response rates (33.3%) but this was not statistically different from the placebo. Intervention patients experienced a 56.7% reduction in rescue analgesics during the study compared to 8% for the placebo group. Patients in the intervention reported better |

|                                                  |                  |                                    |                              |          |                                                                                                                                                                                                                  |                                                                                                                                                                                                                   |                                                                                                                        |                                             |                                |                                                                                                                                  |                                                                                                                                                                                                                                                                                                                                                                           |
|--------------------------------------------------|------------------|------------------------------------|------------------------------|----------|------------------------------------------------------------------------------------------------------------------------------------------------------------------------------------------------------------------|-------------------------------------------------------------------------------------------------------------------------------------------------------------------------------------------------------------------|------------------------------------------------------------------------------------------------------------------------|---------------------------------------------|--------------------------------|----------------------------------------------------------------------------------------------------------------------------------|---------------------------------------------------------------------------------------------------------------------------------------------------------------------------------------------------------------------------------------------------------------------------------------------------------------------------------------------------------------------------|
|                                                  |                  |                                    |                              | Jadad: 3 | Number enrolled: 157<br>Number included in analysis of results: 154<br>Age: 58.7 yrs<br>Gender: 45.2% male<br>Race/ethnicity: Not reported<br>Disease: Cancer (77%)<br>Severity: Those with cancer, advanced     |                                                                                                                                                                                                                   | µg/h                                                                                                                   |                                             |                                | rates of good or complete pain relief than placebo (43.5% vs. 32.4%, respectively).                                              |                                                                                                                                                                                                                                                                                                                                                                           |
| Smith et al., 2002 (44); USA, Spain, Switzerland | Pain             | Medtronic, Inc.                    | RCT                          | Jadad: 2 | Number approached: 202<br>Number enrolled: 200<br>Number included in analysis of results: 148<br>Age: 56.2 yrs<br>Gender: 51.5% male<br>Race/ethnicity: Not reported<br>Disease: Cancer<br>Severity: Advanced    | Patients with advanced cancer who had a documented average pain VAS ≥5 at two measurements within a week of study randomization were recruited from multiple centers (either hospitals or pain treatment centers) | Intrathecal drug delivery system (IDDS) plus comprehensive medical management (CMM)                                    | Comprehensive medical management (CMM) only | 4 weeks                        | Pain rating scale using VAS, adverse events, common toxicity criteria                                                            | 84.5% of intervention patients achieved clinical success relative to 70.8% of control patients (p=0.05). IDDS patients were more likely to achieve ≥20% reduction in pain and toxicity than CMM-only patients (p=0.02 and p=0.004, respectively). IDDS patients had significant reductions in fatigue and level of consciousness (p<0.05) and improved survival (p=0.06). |
| Soden et al., 2004 (39); UK                      | Pain, depression | Foundation for Integrated Medicine | RCT                          | Jadad: 5 | Number approached: Not reported<br>Number enrolled: 42<br>Number included in analysis of results: 36<br>Age: 73 yrs<br>Gender: 24% Male<br>Race/ethnicity: Not reported<br>Disease: Cancer<br>Severity: Advanced | Patients with advanced cancer from three specialist palliative care units over a 2-year period                                                                                                                    | Intervention 1: weekly massage with lavender essential oil; intervention 2: weekly massage with inert carrier oil only | No massage                                  | Not reported                   | Pain rating using VAS, Verran and Snyder-Halpern sleep scale, Hospital Anxiety and Depression scale, Rotterdam Symptom Checklist | There were no significant long-term benefits of aromatherapy or massage in terms of pain control, anxiety, or quality of life. However, sleep scores improved significantly in both the massage and the combined massage/aromatherapy groups. Depression scores were reduced in the massage group.                                                                        |
| Stephenson et al., 2000 (47); USA                | Pain             | Not reported                       | Pre-post (patients served as |          | Number approached: Not reported                                                                                                                                                                                  | Patients with breast and lung cancer on a medical oncology unit in the Southeastern United States                                                                                                                 | 30 minute foot reflexology                                                                                             | NA                                          | Baseline and immediately after | Anxiety and pain                                                                                                                 | Anxiety decreased after the sessions, but pain did not.                                                                                                                                                                                                                                                                                                                   |

|                                  |            |                                     | own controls)    |                                                                                                                                                                                                                                                     | session                                                                                                                                                                                                                                                                                                                                                                                                                                                                                                                                                                      | reflexology                          |                       |                      |                                                                                       |                                                                                                                                                           |  |
|----------------------------------|------------|-------------------------------------|------------------|-----------------------------------------------------------------------------------------------------------------------------------------------------------------------------------------------------------------------------------------------------|------------------------------------------------------------------------------------------------------------------------------------------------------------------------------------------------------------------------------------------------------------------------------------------------------------------------------------------------------------------------------------------------------------------------------------------------------------------------------------------------------------------------------------------------------------------------------|--------------------------------------|-----------------------|----------------------|---------------------------------------------------------------------------------------|-----------------------------------------------------------------------------------------------------------------------------------------------------------|--|
|                                  |            |                                     | Jadad: NA        | Number enrolled: 23<br>Number included in analysis of results: 23<br>Age: mean 69 years<br>Gender: male 8 /23<br>Race/ethnicity: white 17/23<br>Disease: Cancer<br>Severity: 15/23 with metastatic disease                                          |                                                                                                                                                                                                                                                                                                                                                                                                                                                                                                                                                                              |                                      |                       |                      |                                                                                       |                                                                                                                                                           |  |
| Sultzer et al., 2001 (72); USA   | Depression | National Institute of Mental Health | Double-blind RCT | Number approached: Not reported<br><br>Jadad: 2<br>Number enrolled: 28<br>Number included in analysis of results: 28<br>Age: 72.3 yrs<br>Gender: 100% Male<br>Race/ethnicity: Not reported<br>Disease: Dementia<br>Severity: Moderately advanced    | Patients seen in the Memory Disorders Clinic or the Geropsychiatry Inpatient Unit of the West Los Angeles Department of Veterans Affairs Medical Center with exhibited agitated behavior requiring pharmacologic intervention. Patients were excluded if they met DSM-IV criteria for a major depressive episode, psychoactive substance use disorder, or delirium. Also excluded if there was a history of psychotic symptoms, unrelated dementia, seizure disorder, Parkinson disease, unstable medical illness, or previous adverse response to trazodone or haloperidol. | Haloperidol, 1–5 mg/d                | Trazodone 50–250 mg/d | 9 weeks              | Delusion scale, Hamilton Depression Rating Scale, Cohen–Mansfield Agitation Inventory | Agitation scores improved in both groups over the 9 week period. Depression scores also improved over the study period in both groups.                    |  |
| Weiner et al., 1999 (30); Israel | Dyspnea    | Not reported                        | RCT              | Number approached: Not reported<br><br>Jadad: 2<br>Number enrolled: 20<br>Number included in analysis of results: 20<br>Age: mean 68 years<br>Gender: Not reported<br>Race/ethnicity: Not reported<br>Disease: CHF<br>Severity: mean NYHA stage 2.4 | Consecutive patients                                                                                                                                                                                                                                                                                                                                                                                                                                                                                                                                                         | Specific inspiratory muscle training | Sham training         | Baseline to 3 months | Inspiratory strength and endurance, 12 minute walk, exercise tolerance, and dyspnea   | Dyspnea worsened in the control (1.0 unit, p<0.005) but was unchanged among intervention patients, as well as objective parameters of endurance improved. |  |

|                                 |                  |              |          |                                                                                                                                                                                    |                                                                                                                                                                |                                                      |                                         |         |                                                                                         |                                                                                                                                                                                                             |
|---------------------------------|------------------|--------------|----------|------------------------------------------------------------------------------------------------------------------------------------------------------------------------------------|----------------------------------------------------------------------------------------------------------------------------------------------------------------|------------------------------------------------------|-----------------------------------------|---------|-----------------------------------------------------------------------------------------|-------------------------------------------------------------------------------------------------------------------------------------------------------------------------------------------------------------|
| Wilkinson et al., 1999 (40); UK | Pain, depression | Not reported | RCT      | Number approached: Not reported                                                                                                                                                    | Patients with advanced cancer attending a palliative care center either as an inpatient or outpatient and referred to the aromatherapy coordinator for massage | Full body massage with Roman chamomile essential oil | Full body massage with carrier oil only | 3 weeks | Rotterdam Symptom Checklist, patient preference of treatment, quality of life, activity | Massage with or without aromatherapy reduced levels of anxiety for patients. The addition of the essential oil resulted in improvements in physical and psychological symptoms, as well as quality of life. |
|                                 |                  |              | Jadad: 3 | Number enrolled: 103<br>Number included in analysis of results: 87<br>Age: 53.5 years<br>Gender: 10% Male<br>Race/ethnicity: Not reported<br>Disease: Cancer<br>Severity: Advanced |                                                                                                                                                                |                                                      |                                         |         |                                                                                         |                                                                                                                                                                                                             |

|                               |            |              |          |                                                                                                                                                                                                                                                                                                                                                                         |                                                                                  |                     |                |                    |                                                                                                              |                                                       |
|-------------------------------|------------|--------------|----------|-------------------------------------------------------------------------------------------------------------------------------------------------------------------------------------------------------------------------------------------------------------------------------------------------------------------------------------------------------------------------|----------------------------------------------------------------------------------|---------------------|----------------|--------------------|--------------------------------------------------------------------------------------------------------------|-------------------------------------------------------|
| Wilcock et al., 2004 (73); UK | Depression | Not reported | RCT      | Number approached: Not reported                                                                                                                                                                                                                                                                                                                                         | Attendees to a cancer palliative day care center approached on their third visit | Weekly aromatherapy | Day care alone | Baseline to week 4 | Bother and intensity of two most bothersome physical symptoms, overall quality of life, emotional well-being | No improvement in symptoms, mood, or quality of life. |
|                               |            |              | Jadad: 2 | Number enrolled: 46<br>Number included in analysis of results: 23<br>Age: mean years 74 intervention vs. 71 control<br>Gender: male 17/23 intervention vs. 17/23 control<br>Race/ethnicity: Not reported<br>Disease: Cancer<br>Severity: All attended a specialty palliative care center, and approximately 13 of original enrollees were too ill to complete the trial |                                                                                  |                     |                |                    |                                                                                                              |                                                       |

\* CCT = controlled clinical trial; CHF = congestive heart failure; COPD = chronic obstructive pulmonary disease; ED = emergency department; GP = general practitioner; HR-QOL = health-related quality of life; NA = not applicable; NYHA = New York Heart Association; RCT = randomized, controlled trial; UK = United Kingdom; USA = United States of America; VAS = visual analogue scale; WHO = World Health Organization.
